## RESEARCH ARTICLE

# Who are the most affected by *Bothrops* snakebite envenoming in Brazil? A Clinical-epidemiological profile study among the regions of the country

Wesley Ruan Guimarães Borges da Silva<sup>1,2\*</sup>, Lucas de Siqueira Santos<sup>3</sup>, Derick Lira<sup>1,4</sup>, Karla Patrícia de Oliveira Luna<sup>1,5,6</sup>, Sayonara Maria Lia Fook<sup>7</sup>, Rômulo Romeu Nóbrega Alves<sup>1,4,8\*</sup>

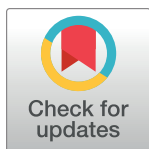

**1** Department of Biology, Center of Biological and Health Sciences, Paraíba State University, Campina Grande, Paraíba, Brazil, **2** Graduate Program in Bioinformatics, Department of Biophysics and Pharmacology, Federal University of Rio Grande do Norte, Natal, Rio Grande do Norte, Brazil, **3** Graduate Program in Geodetic Sciences and Geoinformation Technologies, Department of Cartographic Engineering, Federal University of Pernambuco, Recife, Pernambuco, Brazil, **4** Graduate Program in Ecology and Conservation, Department of Biology, Paraíba State University, Campina Grande, Paraíba, Brazil, **5** Graduate Program in Science Teaching and Mathematics Education, Department of Biology, Paraíba State University, Campina Grande, Paraíba, Brazil, **6** Graduate Program in Cellular and Molecular Biology, Department of Molecular Biology, Federal University of Paraíba, João Pessoa, Paraíba, Brazil, **7** Graduate Program in Public Health, Department of Pharmacy, State University of Paraíba, Campina Grande, Paraíba, Brazil, **8** Graduate Program in Ethnobiology and Nature Conservation, Federal Rural University of Pernambuco, Recife, Pernambuco, Brazil

\* [Wesley.silva.128@ufrn.edu.br](mailto:Wesley.silva.128@ufrn.edu.br), [Wesleyfumer@gmail.com](mailto:Wesleyfumer@gmail.com) (WRGBdS); [Romulo\\_nobrega@yahoo.com.br](mailto:Romulo_nobrega@yahoo.com.br) (RRdNA)

## OPEN ACCESS

**Citation:** da Silva WRGB, de Siqueira Santos L, Lira D, de Oliveira Luna KP, Fook SML, Alves RRN (2023) Who are the most affected by *Bothrops* snakebite envenoming in Brazil? A Clinical-epidemiological profile study among the regions of the country. *PLoS Negl Trop Dis* 17(10): e0011708. <https://doi.org/10.1371/journal.pntd.0011708>

**Editor:** Wayne Hodgson, Monash University, AUSTRALIA

**Received:** June 30, 2023

**Accepted:** October 3, 2023

**Published:** October 19, 2023

**Copyright:** © 2023 da Silva et al. This is an open access article distributed under the terms of the [Creative Commons Attribution License](https://creativecommons.org/licenses/by/4.0/), which permits unrestricted use, distribution, and reproduction in any medium, provided the original author and source are credited.

**Data Availability Statement:** All relevant data are within the manuscript and its [Supporting Information](#) files.

**Funding:** In part, this study was financed by Paraíba State University (Public Notice PRPGP No. 02/2023, grant #02/2023, RA). The funder had no role in study design, data collection and analysis, decision to publish, or preparation of the manuscript.

## Abstract

Snakebite envenoming represents an important Neglected Tropical Disease (NTD) that mainly affects tropical and subtropical developing countries according to the World Health Organization (WHO). As a priority issue in the tropics, it is estimated that accidental encounter between snakes and humans is the leading cause of morbidity and mortality among all NTDs in the world. In Brazil, an extremely diverse country with continental dimensions, snakebite envenoming is the second leading cause of reported human envenoming. Treating the disease has been an unprecedented challenge for Brazilian Health Systems for decades. Despite access to Antivenom therapy and distributing it free of charge across the country, Brazil faces numerous issues regarding the notification process and accurate treatment targeting for at-risk populations. Thus, this study aimed to identify the temporal epidemiological dynamics of accidents caused by *Bothrops* snakes in Brazil, the country's major group of venomous snakes, based on secondary information from the online database provided by The Brazilian Notifiable Diseases Information System (SINAN). For this purpose, reported *Bothrops* snakebites between 2012 and 2021 were counted, then the data were analyzed. We looked at the frequency, occurrence, mortality rates, case fatality rate (CFR), age and gender distribution, and the time lapse between the incident and the initiation of Antivenom therapy. The data were also organized considering regional variations of the country. Throughout the studied period, a total of 202,604 cases of envenoming caused by

**Competing interests:** The authors have declared that no competing interests exist.

*Bothrops* spp. were notified, resulting in 766 fatalities. These accidents were found to occur in variable proportions across different regions in Brazil, with notable concentrations observed in the North, Northeast, and Southeast regions. The epidemiological profile of patients varied greatly between the regions, revealing that snake envenoming is much more a social, economic, and ecological problem than a medical one. In conclusion, our study provides an overview of the clinical and epidemiological profile of envenoming by *Bothrops* snakes in Brazil. Notably, this is the first study to present such information in a country as vast and diverse as Brazil, encompassing a comparative analysis of its regions using SINAN data, that proves to be a very useful national tool to improve the control and management of envenoming.

### Author summary

Snakebite envenoming is a health challenge worldwide. In Brazil, the largest country in Latin America, *Bothrops* snakebites represent the main cause of envenoming by venomous snakes. Every year, at least 20,000 accidents with *Bothrops* snakes are notified by The Brazilian Information System for Notifiable Diseases (SINAN). However, it is well known that these numbers do not represent reality in many cases, since a significant portion of envenoming patients continue to disperse specialized medical care or are unable to arrive in time at the reference medical centers. Therefore, in our comprehensive study with secondary data made available online by SINAN, we decided to understand the temporal dynamics of *Bothrops* snakebites over a ten-year period across the five regions of Brazil. According to our results, which evaluated variables such as occurrence, incidence, mortality and lethality, envenoming by *Bothrops* snakes remains an important neglected public health problem in our country. Currently, the high rates of occurrence and incidence in certain regions are due to socioeconomic problems found in a vast and developing country such as Brazil. Despite this, lethality and mortality rates remain low at all regions of the country, a fact that can be associated with the effectiveness of the Antivenom therapy treatment provided free of charge by The Brazilian National Health System (SUS).

## 1. Introduction

Snakebite envenoming represents a neglected public health disease that mainly affects tropical and subtropical developing countries [1–6]. Worldwide, it is estimated that the accidental encounter between snakes and humans is the main cause of morbidity and mortality among all Neglected Tropical Diseases (NTDs) listed by World Health Organization such as priority diseases in the tropics [7–9].

Annually, 5.4 million snakebites are reported in the world, that results in 1.8 to 2.7 million envenoming and 81,000–138,000 deaths [9–11]. Despite this, the true incidence of global snakebites remains unknown due to underreporting [8,12]. Among those affected are mainly agricultural workers and children, who live in poorly built houses, normally, remote areas from access to education and health care centers [3,13]. As a result, snakebite envenoming is treated as an occupational disease with a social and economic nature [10].

Evaluation of the incidence and mortality, as well as the identification of regions at risk is necessary to design mapping and surveillance measures [14]. These measures must assist in

developing of new strategies for diagnosis, monitoring and treatment, aiming at the prevention and reduction of these accidents, as well as the promotion of therapeutic actions for the control of the disease [5,14–17], which include offering Antivenom to neutralize the effects of toxins in the blood of envenoming patients [18–21].

Methods capable of mapping epidemiological scenarios have existed for decades, but they have not been sufficient to identify the entire situation related to snakebite envenoming [22,23]. In this context, statistical and mathematical models capable of estimating and predicting epidemiological patterns have been developed [24]. However, many of these data are grouped on country-level scales, which on several occasions makes it difficult to carry out more accurate analyses for the envenoming in certain countries, such as Brazil [5,13,17,25].

Brazil is considered a model country for epidemiological surveys on snakebite envenoming, according to its high zoological, ecological [13,26], climatic [27,28] and socioeconomic diversity [29,30]. Only between 2011 and 2020, 1.9 million accidents with snakes were recorded in this country, of which at least 1.7 million were caused by unidentified snakes, 17,000 accidents by non-venomous snakes and 235,872 by venomous snakes such as *Bothrops* spp., the major group of venomous snakes in this country [31–33].

The Neotropical genus *Bothrops* is an assemblage of about 48 species distributed from Mexico to Argentina [33]. These animals are found in a variety of habitats, from tropical rainforests, lowland or mountainous areas, grasslands, and dry habitats [34–36]. Namely, 30 species of the genus can be found in Brazil [33]. Due to its size and biodiversity, the Amazon region is home for many of them [37,38], however only *Bothrops atrox* is responsible for about 80 to 90% of the accidents in this region [39].

In certain areas of Northeast of the Brazil, *B. erythromelas* has been identified as the main agent of snakebite envenoming [27,40–42]. In the South and Southeast, ecological and toxicological research with *B. jararaca* is performed due to its medical significance in snakebite envenoming to these regions [43,44]. For the Brazilian Cerrado regions, Midwest region of Brazil, *B. moojeni* is commonly found, and its accidental interaction with humans can lead to envenoming cases [45].

Despite the acknowledged significance of *Bothrops* snakebites, there remains a pressing need for heightened attention towards this issue. One key exacerbating factor, with a global impact, is the limited focus and support from funding organizations, public health authorities, pharmaceutical industry stakeholders, and health advocacy groups. This lack of attention hinders the development of effective interventions, leading to increased impracticality and difficulty in addressing the problem more assertively [10].

To monitor, analyse and improve the understanding of the occurrence of human envenoming in Brazil, the Health Information Systems (SIS) are used in the collection and storage of epidemiological data [46]. Introduced in 1998 [47], The Brazilian Notifiable Diseases Information System (SINAN) plays a pivotal role in monitoring snakebite envenoming. Since its inception, SINAN has become the crucial for at least two thousand health care centers dedicated to envenoming, to conduct new research studies, developing strategies and prevention measures [48,49].

Thus, identifying the temporal epidemiological dynamics of *Bothrops* snakebites in Brazil can be done based on the online database provided by the SINAN, and will help in making decisions to improve management and treatment of the disease. Based on this, three important questions can be raised and should serve as the basis for this study: (1) What are the populations that lack a political voice and suffer most from *Bothrops* snakebites in Brazil? (2) What has been the temporal therapeutic itinerary taken by patients and how has this influenced the management and treatment of the envenoming? (3) How can these data help the Ministry of Health's National Zoonosis Surveillance and Health programs?

## 2. Methods

### 2.1 Ethical aspects

The SINAN and IBGE databases, which are in the public domain, do not contain identifiable information regarding individuals. In 2016, a new resolution published by the National Health Council (CNS-BR) revoked the need to seek approval from any Research Ethics Committee for studies using publicly available secondary data that do not provide individually identifiable information (<http://conselho.saude.gov.br/resolucoes/2016/reso510.pdf>), since publicly accessible information can be used in the context of research and in the transmission of knowledge without restricting the access of researchers and citizens in general, not being subject to limitations related to privacy, security or access control. Thus, supported by the terms established by Resolution of the National Health Council No. 510, of April 7, 2016, it was not necessary to request approval of the research by an ethics committee.

### 2.2 Study area

Brazil is the largest country in Latin America in terms of land area (8,515,767 km<sup>2</sup>) [50] and is home to a population of 190,755,799 individuals, as per the most recent demographic census, conducted in 2010 by the Brazilian Institute of Geography and Statistics [51]. The country is divided into five major administrative regions and comprises 26 states, along with the Federal District. Most of the Brazilian population is concentrated in urban areas, with only 15.6% residing in rural regions. However, regional disparities exist, as approximately 27% of the population in the North and Northeast regions live in rural areas, compared to just 7.1% in the Southeast. Additionally, around 3% of the total population comprises agricultural workers [51]. Discrepancies in literacy rates are also evident, ranging from 95.9% in the South to 83.8% in the Northeast Region, with an average of 92.0% for the country [52]. Similarly, significant variations in Gross Domestic Product (GDP) per capita are observed, with figures ranging from R\$34,790 in the Southeast to R\$12,955 in the Northeast [53].

### 2.3 Data collection, population and study design

Information about *Bothrops* envenoming in Brazil between 2012 and 2021 was collected from The Brazilian Notifiable Diseases Information System (SINAN) of the Brazilian Ministry of Health. In this system, the identification of snake genus relied on information provided by the victim or their companion, as well as on observations of signs and clinical symptoms noted by health officials, that use, routinely, the guidelines for identification purposes found in Venomous Animal Accident Treatment Manual, provided by The Brazilian National Health Foundation [54] and the guidelines found in Health Surveillance Guide of the Brazilian Ministry of Health [55]. In Brazil the envenoming data is collected in toxicological centers from Notification Forms (<http://portalsinan.saude.gov.br/Sinan>). To our analyzes we collected (a) number of cases per year according to the state of notification; (b) ethnicity, gender and age range of admitted patients; (c) time elapsed between the accident and health care center; (d) presence of local manifestations and complications; and (e) presence of systemic manifestations and complications.

### 2.4 Statistical data analysis

All data collected were transferred to Excel and analyzed in R software. Trend curves and R<sup>2</sup> correlation indices were calculated, and the significance level was equal to 0.05. The incidence of cases was identified based on the number of accidents reported during the study period divided by the number of the population of each state/region x 100,000 inhabitants [56]. To

verify differences between snakebite envenoming in populations defined by male and female gender, we used the chi-square test ( $\chi^2$ ). Therefore, we considered the total number of snake envenoming per region over the years as a response variable and gender as an explanatory variable. Allied to this, to verify differences in the occurrence of envenoming between years by region and age groups, a non-parametric Kruskal-Wallis (H) test was used followed by a post-hoc Dunn test. In the first test, we evaluated the total number of snake envenoming between 2012 and 2021 by region, and from the second test, we compared envenoming by age group using the following sample sizes: under 1 year old, from 1–4, 5–9, 10–14, 15–19, 20–39, 40–59, 60–64, 65–69, 70–79 and over 80 years old.

## 2.5 Access to mortality and lethality rates

Mortality rates (1) per 100,000 inhabitants and lethality (2) (%) were calculated according to the equations:

$$(1) \quad \text{Mortality} = \frac{(\text{number of deaths}) \cdot 100,000}{\text{population}}$$

$$(2) \quad \text{Lethality} = \frac{(\text{number of deaths}) \cdot 100}{(\text{number of cases})}$$

## 2.6 Graphic resources and maps

The maps that show the spatial distribution of occurrences and incidence rates of cases of envenoming were made using the open-source software QGIS, version 3.16.10. The choice of intervals represented on the maps was made by rounding off the intervals generated by Jenks' classification by natural breaks [57]. The method aims at minimizing variance within groups of similar values and maximizing differences between different groups. In this way, the method used becomes ideal for representing data that have an irregular distribution between them. Data regarding the spatial distribution of reference centers for handling accidents caused by *Bothrops* spp. were obtained from Brasil [58], and the addresses were geocoded (i.e., transformed into geographical coordinates) using the Vilimpoc et al. code [59], which links a Google Sheets macro to the Google Maps geocoding API to automatically extract addresses.

## 3. Results

### 3.1 Epidemiological profile of accidents with *Bothrops* in Brazil

In Brazil, between 2012 and 2021, 202,604 cases of envenoming caused by *Bothrops* snakes were recorded. During this period, the largest number of cases was geographically concentrated in the North region, which accounted for 79,145 (39%), followed by the Northeast and Southeast, both with approximately 21% of the registered occurrences, with 42,794 and 42,409, respectively. In the Midwest region (21,683 cases or 11%) and South (16,573 cases or 8%) the lowest occurrences were recorded (Table 1 and Fig 1).

To understand the epidemiological dynamics of reported envenoming in the five Brazilian regions, we proceeded with a ranking analysis based on the occurrence and incidence rates observed annually for each of the 27 federation units (FU) (Fig 2A and 2C). The states of Pará (PA), Minas Gerais (MG) and Bahia (BA) had the highest occurrences of envenoming with *Bothrops* snakes in the country in ten years (Fig 2A). Regarding the incidence, we identified noticeable differences between the North, Northeast, South, Southeast and Midwest, especially because the states Roraima (RO), Pará (PA) and Amapá (AP), three states in the north of Brazil, had an average incidence above 50 envenoming/100,000 inhabitants (Figs 1C and 2C).

**Table 1. Annual occurrence of envenoming with *Bothrops* snakes among the five regions of Brazil (North, Northeast, South, Southeast and Midwest) during 2012–2021.**

| Region       | FU    | 2012         | 2013         | 2014         | 2015         | 2016         | 2017         | 2018         | 2019         | 2020         | 2021         | Total         | (%)         |
|--------------|-------|--------------|--------------|--------------|--------------|--------------|--------------|--------------|--------------|--------------|--------------|---------------|-------------|
| North        | RO    | 348          | 337          | 404          | 394          | 375          | 369          | 464          | 478          | 486          | 419          | 4074          | 2%          |
|              | AC    | 242          | 283          | 284          | 343          | 325          | 321          | 330          | 348          | 354          | 339          | 3169          | 2%          |
|              | AM    | 1063         | 1216         | 1165         | 1023         | 1099         | 1287         | 1467         | 1754         | 1776         | 1800         | 13650         | 7%          |
|              | RR    | 295          | 281          | 275          | 242          | 257          | 349          | 404          | 358          | 302          | 280          | 3043          | 2%          |
|              | PA    | 4187         | 4650         | 4580         | 4507         | 4394         | 4486         | 4498         | 5007         | 5046         | 4790         | 46145         | 23%         |
|              | AP    | 251          | 251          | 329          | 296          | 286          | 349          | 394          | 459          | 367          | 400          | 3382          | 2%          |
|              | TO    | 690          | 602          | 581          | 603          | 588          | 440          | 536          | 612          | 595          | 435          | 5682          | 3%          |
|              | Total | 7076         | 7620         | 7618         | 7408         | 7324         | 7601         | 8093         | 9016         | 8926         | 8463         | 79145         | <b>39%</b>  |
| Northeast    | MA    | 1075         | 1032         | 1113         | 1084         | 752          | 835          | 970          | 1346         | 1462         | 1581         | 11250         | 5,6%        |
|              | PI    | 109          | 72           | 74           | 76           | 88           | 96           | 101          | 136          | 158          | 198          | 1108          | 0,5%        |
|              | CE    | 378          | 285          | 255          | 376          | 451          | 463          | 457          | 577          | 528          | 503          | 4273          | 2,1%        |
|              | RN    | 156          | 71           | 102          | 158          | 223          | 247          | 231          | 358          | 391          | 316          | 2253          | 1,1%        |
|              | PB    | 184          | 105          | 108          | 213          | 222          | 210          | 207          | 281          | 340          | 265          | 2135          | 1,1%        |
|              | PE    | 215          | 145          | 128          | 238          | 291          | 219          | 248          | 286          | 294          | 377          | 2441          | 1,2%        |
|              | AL    | 82           | 104          | 79           | 100          | 106          | 101          | 93           | 105          | 83           | 114          | 967           | 0,5%        |
|              | SE    | 54           | 49           | 34           | 105          | 50           | 77           | 59           | 84           | 48           | 72           | 632           | 0,3%        |
|              | BA    | 1913         | 1881         | 1581         | 1750         | 1779         | 1831         | 1560         | 1690         | 1899         | 1851         | 17735         | 8,8%        |
|              | Total | 4166         | 3744         | 3474         | 4100         | 3962         | 4079         | 3926         | 4863         | 5203         | 5277         | 42794         | <b>21%</b>  |
| Southeast    | MG    | 2609         | 2491         | 1799         | 1805         | 1567         | 2066         | 2126         | 2138         | 2173         | 1814         | 20588         | 10%         |
|              | ES    | 777          | 790          | 577          | 596          | 500          | 586          | 743          | 595          | 6            | 1            | 5171          | 3%          |
|              | RJ    | 503          | 476          | 396          | 452          | 430          | 498          | 522          | 534          | 489          | 372          | 4672          | 2%          |
|              | SP    | 1216         | 1078         | 1200         | 1188         | 1038         | 1318         | 1245         | 1228         | 1238         | 1229         | 11978         | 6%          |
|              | Total | 5105         | 4835         | 3972         | 4041         | 3535         | 4468         | 4636         | 4495         | 3906         | 3416         | 42409         | <b>21%</b>  |
| South        | PR    | 528          | 494          | 545          | 543          | 571          | 545          | 443          | 468          | 416          | 391          | 4944          | 2%          |
|              | SC    | 623          | 552          | 577          | 581          | 541          | 544          | 501          | 494          | 534          | 482          | 5429          | 3%          |
|              | RS    | 707          | 652          | 659          | 720          | 689          | 705          | 565          | 588          | 483          | 432          | 6200          | 3%          |
|              | Total | 1858         | 1698         | 1781         | 1844         | 1801         | 1794         | 1509         | 1550         | 1433         | 1305         | 16573         | <b>8%</b>   |
| Midwest      | MS    | 445          | 359          | 383          | 400          | 388          | 430          | 384          | 390          | 288          | 259          | 3726          | 1,9%        |
|              | MT    | 953          | 920          | 952          | 1061         | 1010         | 988          | 848          | 1083         | 971          | 853          | 9639          | 4,9%        |
|              | GO    | 767          | 674          | 663          | 661          | 752          | 868          | 722          | 766          | 867          | 971          | 7711          | 3,8%        |
|              | DF    | 64           | 60           | 48           | 58           | 65           | 63           | 64           | 53           | 65           | 67           | 607           | 0,3%        |
|              | Total | 2229         | 2013         | 2046         | 2180         | 2215         | 2349         | 2018         | 2292         | 2191         | 2150         | 21683         | <b>11%</b>  |
| <b>Total</b> |       | <b>20434</b> | <b>19910</b> | <b>18891</b> | <b>19573</b> | <b>18837</b> | <b>20291</b> | <b>20182</b> | <b>22216</b> | <b>21659</b> | <b>20611</b> | <b>202604</b> | <b>100%</b> |

<https://doi.org/10.1371/journal.pntd.0011708.t001>

In general, the mean incidence rates seen between 2012 and 2021 were similar in the Northeast, South and Southeast (6.09 to 7.51 envenoming/100,000 inhabitants,  $S_2 = 0.65$ ). Meanwhile, the incidence in the Midwest and, mainly, in the North reaches up to 40.94 envenoming/100,000 inhabitants (Fig 2B). Based on occurrence indicators, four Brazilian states occupy well-defined places in this ranking, Pará (1<sup>st</sup>), Minas Gerais (2<sup>nd</sup>), Bahia (3<sup>rd</sup>) and São Paulo (4<sup>th</sup>) (Fig 2A). Furthermore, according to the annual incidence of cases calculated by FU, we observe a scenario in which four states in the northern region (Amapá, Acre, Pará and Roraima) alternate among themselves in the first three positions (Fig 2C).

In Brazil, the population affected by *Bothrops* spp. is composed of brown, black, white, yellow, indigenous individuals, and another portion whose color/race was not properly identified during medical care, and therefore is classified as ignored or blank. In the North, Northeast and Midwest of the country, 74.92%, 67.38% and 53.08% of the envenoming population are



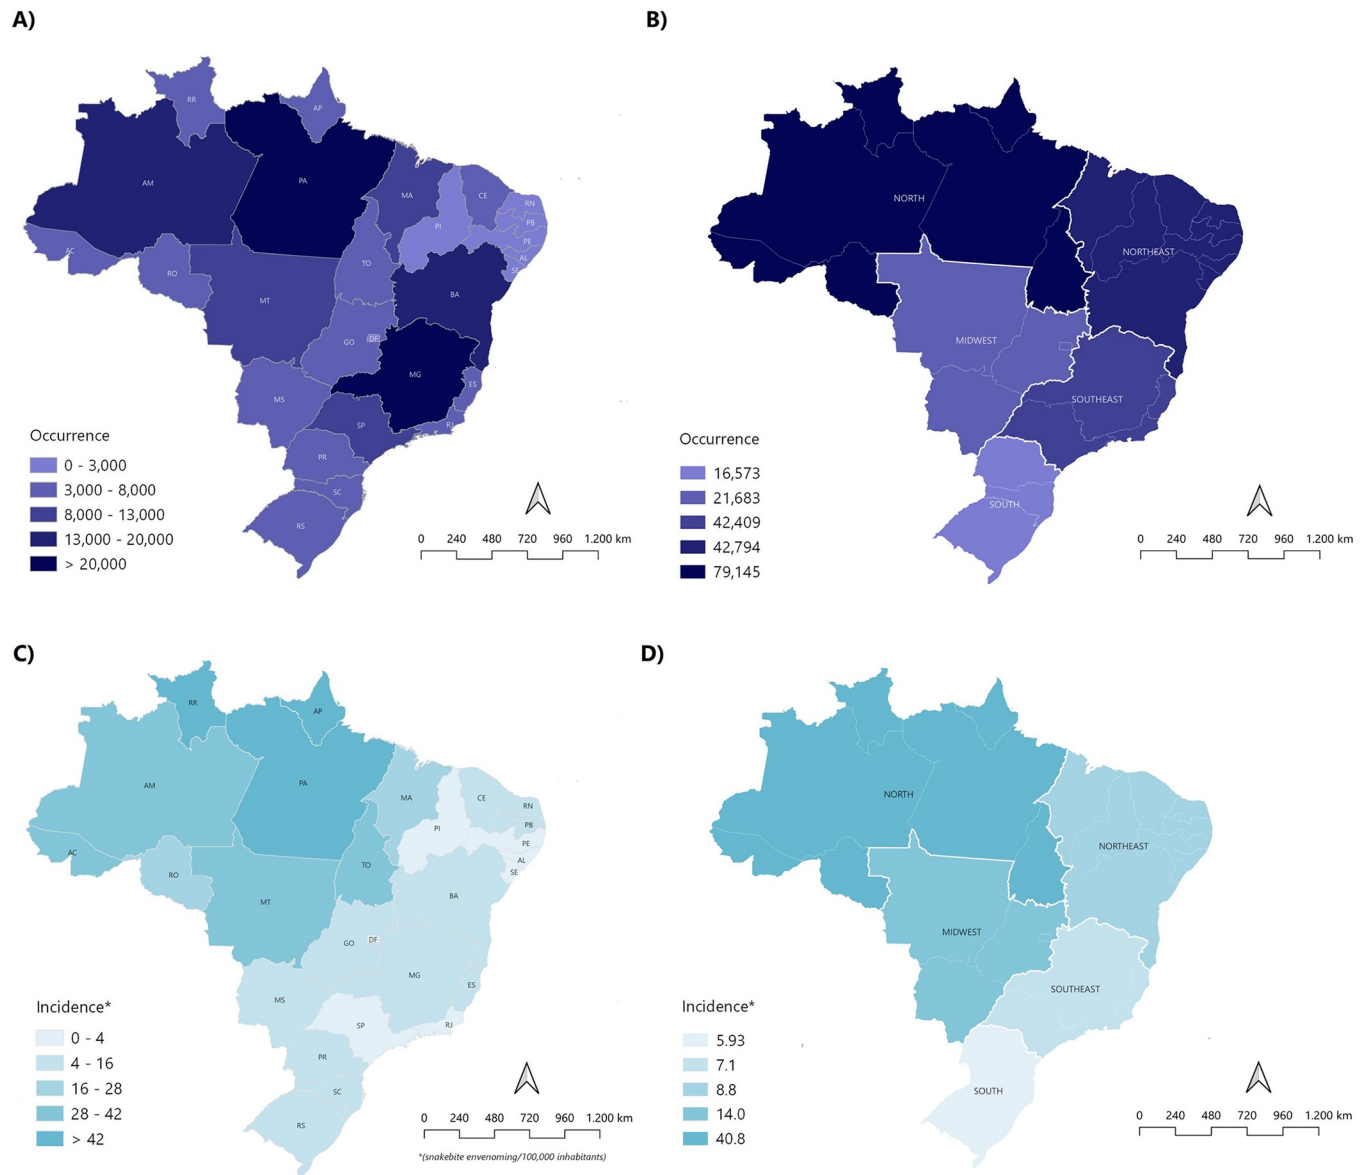

**Fig 1. Occurrence and incidence of envenoming with *Bothrops* snakes in Brazil (2012–2021).** A) Map indicating the cumulative occurrence rates for the study period according to the state. B) Map indicating the cumulative occurrence rates for the study period according to region. C) Map showing the average incidence rates calculated by state (\*envenoming/100,000 inhabitants). D) Map showing the average incidence rates calculated by region (\*envenoming/100,000 inhabitants). The shapefiles for the municipalities, states and country, used for the creation of this map, were extracted from the Brazilian Institute of Geography and Statistics (<https://www.ibge.gov.br/geociencias/todos-os-produtos-geociencias/15774-malhas.html>).

<https://doi.org/10.1371/journal.pntd.0011708.g001>

identified as brown, respectively. While in the South (83.70%) and Southeast (41.94%), those most affected by the disease self-identify as white. Furthermore, in all the regions, the group that suffers least from *Bothrops* spp. envenoming is yellow (the average for the 10 years among the five regions was 0.82%) (Fig 3A).

Regarding the sex of the envenoming patients, we identified a significant difference across the country ( $\chi^2 = 61273$ ,  $p < 0.0001$ ), where 77.51% of the affected population is composed of men while only 22.49% are women, and, infrequently, records that did not identify the patient's gender were found (0.0177%). Also, according to the region of the country, we found

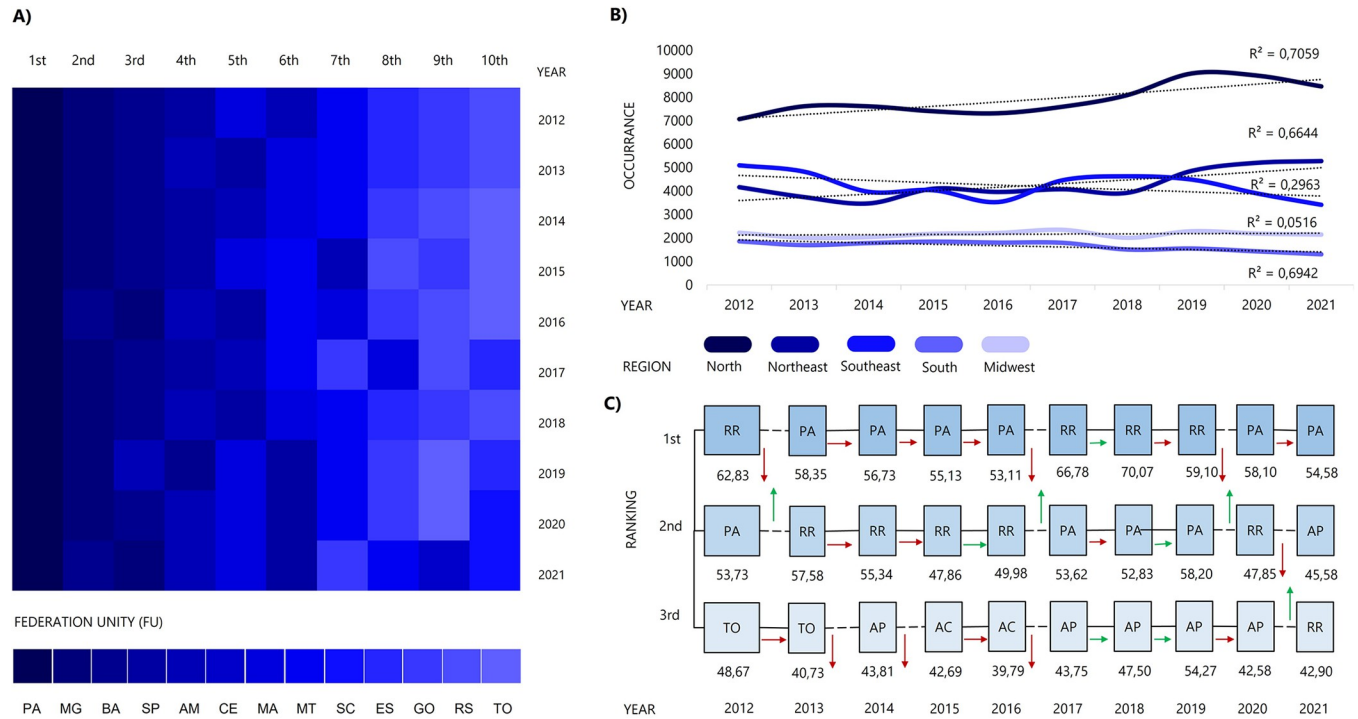

**Fig 2.** A) Ranking of states with the highest occurrences associated with *Bothrops* spp. between 2012 and 2021. B) Trends in the annual occurrence of *Bothrops* envenoming according to the region of the country. The  $R^2$  indicates how close the data are to the calculated linear regression line. C) Ranking of the 3 states with the highest incidence rates. The solid lines connecting the state names indicate that the state’s ranking position has been maintained from one year to the next, while the dashed lines indicate that the position has changed. Relative changes are shown according to annual incidence accompanied by green arrows indicating increase and red arrows indicating decrease.

<https://doi.org/10.1371/journal.pntd.0011708.g002>

that in the North ( $x^2 = 26493$ ,  $p < 0.0001$ ) and Northeast ( $x^2 = 14003$ ,  $p < 0.0001$ ) approximately 79% of the patients were male and 21% to the female sex; in the South ( $x^2 = 4876$ ,  $p < 0.0001$ ) and Southeast ( $x^2 = 11951$ ,  $p < 0.0001$ ) 77% were male and 23% female, and in the Midwest ( $x^2 = 5748$ ,  $p < 0.0001$ ) our results pointed to 76% of the victims being male and 24% female (Fig 3B).

According to the classification of the SINAN, patients are identified in age groups that comprise the blank/ignored groups (IGN), <1 year, between 1–4, 5–9, 10–14, 15–19, 20–39, 40–59, 60–64, 65–69, 70–79, 80 and >80 years. In Brazil, we found significant differences between age groups ( $H = 106.9$ ,  $x^2 = 495.5$ ,  $df = 90$ ,  $p < 0.0001$ ), with more cases of envenoming by *Bothrops* spp. occurring in the groups aged 20 to 39 (34%) and 40 to 59 years (30%) (Fig 3C). According to the region of the country, in the North and Northeast the group aged 20 to 39 is the one that suffers most from envenoming (38% and 33%, respectively), while in the South and Southeast the group aged 40 to 59 years is the most affected by envenoming.

We also verified that between 2012 and 2021, 766 deaths resulting from *Bothrops* spp. were recorded by the SINAN in Brazil. The North and Northeast regions concentrate more than half of the cases in which the patient’s clinical condition evolved to death ( $n = 282$ , 37% and 214, 28%), while in the South only 7% of the cases that had death as an outcome ( $n = 55$ ), and in the Southeast and Midwest 15% and 13% of envenoming, respectively, were fatal. Furthermore, the average mortality and lethality rates (CFR) in the period were 0.053 deaths/100,000 inhabitants and 0.37% for the entire country. These results varied according to the region and year throughout the studied period. However, comparatively, mortality was on average up to seven times higher in the North region than in the other regions, which presented similar results (Table 2).



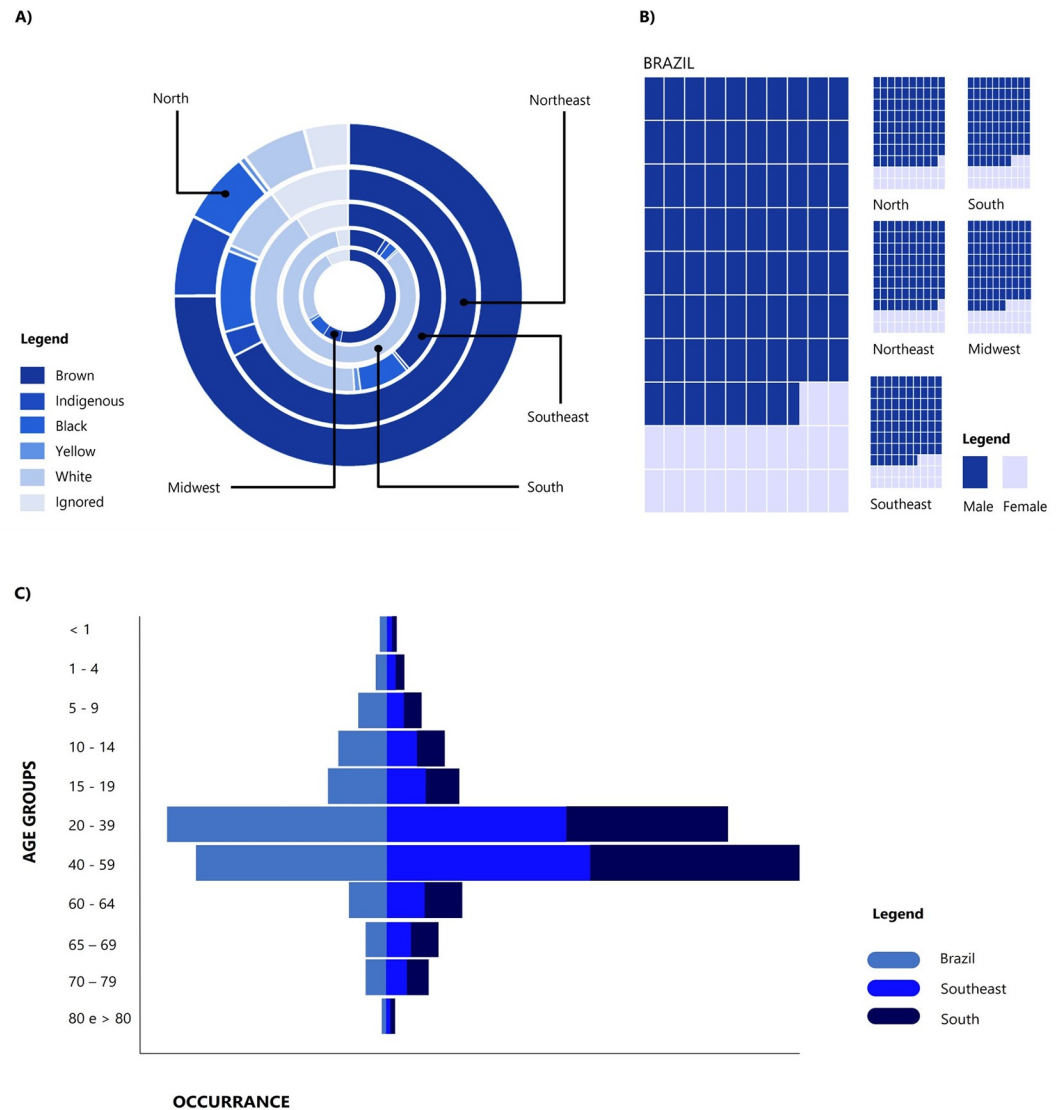

**Fig 3. General characteristics of the population affected by *Bothrops* envenoming between 2012 and 2021 in Brazil.** A) Ethnical characteristics of envenoming victims by region of the country. B) Population affected by envenoming according to gender (female or male). C) Age range of victims (groups: <1 year, between 1–4, 5–9, 10–14, 15–19, 20–39, 40–59, 60–64, 65–69, 70–79, 80 and >80 years).

<https://doi.org/10.1371/journal.pntd.0011708.g003>

### 3.2 Clinical-epidemiological profile of accidents with *Bothrops* in Brazil

Most of the victims of *Bothrops* spp. were bitten on the feet ( $n = 49.3\%$ ), legs ( $n = 19.2\%$ ) and hands ( $n = 11.7\%$ ). According to the region of the country, there were no significant differences for these results, therefore during the studied period, the top 3 most affected body sites across all regions were the feet in first place, legs second and hands third (Table 3).

Among the local manifestations and complications observed in patients, Table 3 indicates that pain ( $\bar{x}$ : 89%) and edema ( $\bar{x}$ : 77%) were the most frequent manifestations, while secondary infection ( $\bar{x}$  3%) represented the major cause of local complications in the clinic. Regarding systemic manifestations and complications, vagal (vomiting and diarrhea) ( $\bar{x}$ : 6%) and hemorrhagic manifestations ( $\bar{x}$ : 4%) were the most common among patients, as the main systemic complications were related to renal failure ( $\bar{x}$ : 0.8%) (Table 4).

Table 2. Access fatality rates (CFR)/100,000 inhabitants in % in Brazil according to region of the country.

| Region       | Case Fatality Rate (CFR) % |             |             |             |             |             |             |             |             |             |              |
|--------------|----------------------------|-------------|-------------|-------------|-------------|-------------|-------------|-------------|-------------|-------------|--------------|
|              | 2012                       | 2013        | 2014        | 2015        | 2016        | 2017        | 2018        | 2019        | 2020        | 2021        | Total        |
| North        | 0,19                       | 0,14        | 0,14        | 0,09        | 0,16        | 0,10        | 0,08        | 0,18        | 0,14        | 0,18        | 0,14         |
| Northeast    | 0,04                       | 0,02        | 0,02        | 0,03        | 0,04        | 0,03        | 0,04        | 0,04        | 0,03        | 0,04        | 0,03         |
| Southeast    | 0,01                       | 0,02        | 0,02        | 0,02        | 0,02        | 0,01        | 0,02        | 0,01        | 0,01        | 0,02        | 0,02         |
| South        | 0,02                       | 0,02        | 0,02        | 0,02        | 0,01        | 0,02        | 0,02        | 0,01        | 0,01        | 0,03        | 0,02         |
| Midwest      | 0,06                       | 0,06        | 0,06        | 0,05        | 0,05        | 0,08        | 0,06        | 0,06        | 0,06        | 0,06        | 0,06         |
| <b>Total</b> | <b>0,06</b>                | <b>0,05</b> | <b>0,05</b> | <b>0,04</b> | <b>0,06</b> | <b>0,05</b> | <b>0,04</b> | <b>0,06</b> | <b>0,05</b> | <b>0,07</b> | <b>0,053</b> |

<https://doi.org/10.1371/journal.pntd.0011708.t002>

### 3.3 Temporal therapeutic itinerary in Brazil: average time elapsed between *Bothrops* snakebite envenoming and first medical care

The average duration from the accident with the snake to initial medical care was estimated to be around 3 hours for approximately 65% of snake envenoming cases attributed to the *Bothrops* genus. However, it is important to note that variations were observed across different regions of the country, as expressed in Fig 4, where the number of cases are depicted as a percentage. In the South and Southeast of the country, more than 40% of cases were seen before the first hour after envenoming, especially in the South region, where this percentage was 48%.

In contrast, in the North and Northeast, 19% and 26% of the population, respectively, arrive at the toxicological care center to receive care before the first hour after envenoming. In these regions, most patients can take up to 6 hours to receive adequate medical attention to treat the envenoming. Furthermore, most patients in the Midwest region are admitted within 3 hours after the accident with the snake occurred (Fig 4).

To address and show key aspects of our work and broaden the possible real-world implication of the temporal itineraries of patient's bites, we create a map that encompasses snakebites incidence by municipalities, along with punctuated distribution of Antivenom in all municipalities of Brazil. The results are shown in Fig 5 and indicates a disproportionate spatial distribution of health centers responsible for the distribution of the Antivenom in Brazil, with a concentration of many of these units in the South and Southeast, while in the North and Northeast regions, which concentrate most of the *Bothrops* envenoming, have a reduced amount these health centers capable of treating envenoming patients in a timely manner.

## 4. Discussion

Between 2012 and 2021 in Brazil, 202,604 cases of *Bothrops* snakebites were reported. This is equal to an average occurrence of 20,260 envenoming every year, aligning with what has already been seen in other studies of epidemiological surveys carried out in the country for other periods ( $\bar{x}$ : 20,000 envenoming/year) [13,60]. Most of the accidents were concentrated in

Table 3. Anatomical location of the bite in Brazil (2012–2021), according to region of the country.

| Affected part of the body / Region | Head        | Arm         | Forearm     | Hand         | Finger       | Stem       | Thigh       | Leg          | Feet         | Toe          | Ignored     | Total         |
|------------------------------------|-------------|-------------|-------------|--------------|--------------|------------|-------------|--------------|--------------|--------------|-------------|---------------|
| North                              | 868         | 1219        | 774         | 6398         | 2452         | 377        | 849         | 18164        | 42830        | 4632         | 582         | 79145         |
| Northeast                          | 475         | 757         | 504         | 5299         | 3164         | 184        | 225         | 5660         | 21863        | 3903         | 760         | 42794         |
| Southeast                          | 467         | 935         | 892         | 6907         | 4075         | 210        | 302         | 7256         | 17932        | 3047         | 386         | 42409         |
| South                              | 171         | 384         | 335         | 2542         | 1548         | 98         | 137         | 3275         | 6803         | 1076         | 204         | 16573         |
| Midwest                            | 209         | 394         | 306         | 2657         | 1356         | 97         | 169         | 4628         | 10363        | 1313         | 191         | 21683         |
| <b>Total</b>                       | <b>2190</b> | <b>3689</b> | <b>2811</b> | <b>23803</b> | <b>12595</b> | <b>966</b> | <b>1682</b> | <b>38983</b> | <b>99791</b> | <b>13971</b> | <b>2123</b> | <b>202604</b> |

<https://doi.org/10.1371/journal.pntd.0011708.t003>

**Table 4. Symptomatology of envenoming by *Bothrops* snakes in Brazil (2012–2021), classified into local manifestations and complications and systemic manifestations and complications.**

| Symptomatology / Region       | North |      | Northeast |      | Southeast |      | South |      | Midwest |      | Brazil<br>Total |
|-------------------------------|-------|------|-----------|------|-----------|------|-------|------|---------|------|-----------------|
|                               | Yes   | (%)  | Yes       | (%)  | Yes       | (%)  | Yes   | (%)  | Yes     | (%)  |                 |
| <b>Local Manifestations</b>   |       |      |           |      |           |      |       |      |         |      |                 |
| Pain                          | 72625 | 92%  | 35220     | 82%  | 38632     | 91%  | 14898 | 90%  | 19395   | 89%  | 89%             |
| Edema                         | 64195 | 81%  | 30311     | 71%  | 31865     | 75%  | 13236 | 80%  | 16483   | 76%  | 77%             |
| Ecchymosis                    | 9854  | 12%  | 4252      | 10%  | 7314      | 17%  | 3692  | 22%  | 3252    | 15%  | 15%             |
| Necrosis                      | 1175  | 1%   | 574       | 1%   | 613       | 1%   | 514   | 3%   | 361     | 2%   | 2%              |
| Others                        | 2644  | 3%   | 3337      | 8%   | 2676      | 6%   | 1603  | 10%  | 1603    | 7%   | 7%              |
| <b>Local Complications</b>    |       |      |           |      |           |      |       |      |         |      |                 |
| Secondary Infection           | 2978  | 3,8% | 830       | 1,9% | 937       | 2,2% | 480   | 2,9% | 761     | 4%   | 3%              |
| Extensive necrosis            | 508   | 0,6% | 178       | 0,4% | 256       | 0,6% | 195   | 1,2% | 186     | 1%   | 1%              |
| Compartment syndrome          | 587   | 0,7% | 109       | 0,3% | 223       | 0,5% | 87    | 0,5% | 207     | 1%   | 1%              |
| Functional deficit            | 524   | 0,7% | 141       | 0,3% | 212       | 0,5% | 143   | 0,9% | 133     | 1%   | 1%              |
| Amputation                    | 50    | 0,1% | 30        | 0,1% | 25        | 0,1% | 16    | 0,1% | 18      | 0,1% | 0,1%            |
| <b>Systemic Manifestation</b> |       |      |           |      |           |      |       |      |         |      |                 |
| Paralytic                     | 3194  | 4,0% | 1789      | 4,2% | 1050      | 2,5% | 392   | 2,4% | 729     | 3%   | 3%              |
| Hemorrhagic                   | 4277  | 5,4% | 1976      | 4,6% | 1553      | 3,7% | 450   | 2,7% | 675     | 3%   | 4%              |
| Vagal                         | 4916  | 6,2% | 2266      | 5,3% | 2302      | 5,4% | 715   | 4,3% | 1582    | 7%   | 6%              |
| Hemolytic                     | 1636  | 2,1% | 837       | 2,0% | 756       | 1,8% | 382   | 2,3% | 476     | 2%   | 2%              |
| Renal                         | 1215  | 1,5% | 616       | 1,4% | 479       | 1,1% | 312   | 1,9% | 463     | 2,1% | 2%              |
| <b>Systemic Complications</b> |       |      |           |      |           |      |       |      |         |      |                 |
| Renal insufficiency           | 342   | 0,4% | 259       | 0,6% | 312       | 0,7% | 184   | 1,1% | 266     | 1%   | 1%              |
| Acute Pulmonary Edema         | 160   | 0,2% | 88        | 0,2% | 136       | 0,3% | 59    | 0,4% | 71      | 0,3% | 0,3%            |
| Sepsis                        | 98    | 0,1% | 31        | 0,1% | 39        | 0,1% | 18    | 0,1% | 19      | 0,1% | 0,1%            |
| Shock                         | 180   | 0,2% | 80        | 0,2% | 83        | 0,2% | 46    | 0,3% | 51      | 0,2% | 0,2%            |

<https://doi.org/10.1371/journal.pntd.0011708.t004>

the North (79,145 cases,  $\bar{x}$ : 7,914 envenoming/year), while a small number of envenoming were registered in the South (16,573 cases,  $\bar{x}$ : 1,657 envenoming/year), as has been shown by Schneider [61].

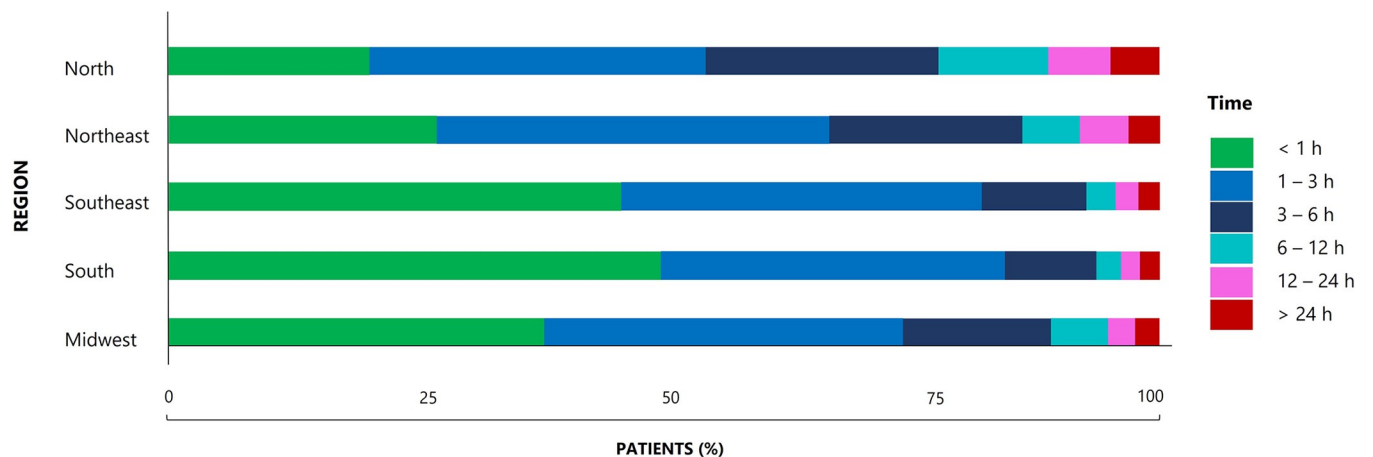

**Fig 4. Temporal itineraries of patients bite by *Bothrops* spp. graphically expressed by region from the moment of the bite until hospitalization (2012–2021).** The different colors of the fragments of each itinerary represent the time that the patients took from the moment of the bite until admission to the toxicological center that provided adequate Antivenom treatment.

<https://doi.org/10.1371/journal.pntd.0011708.g004>

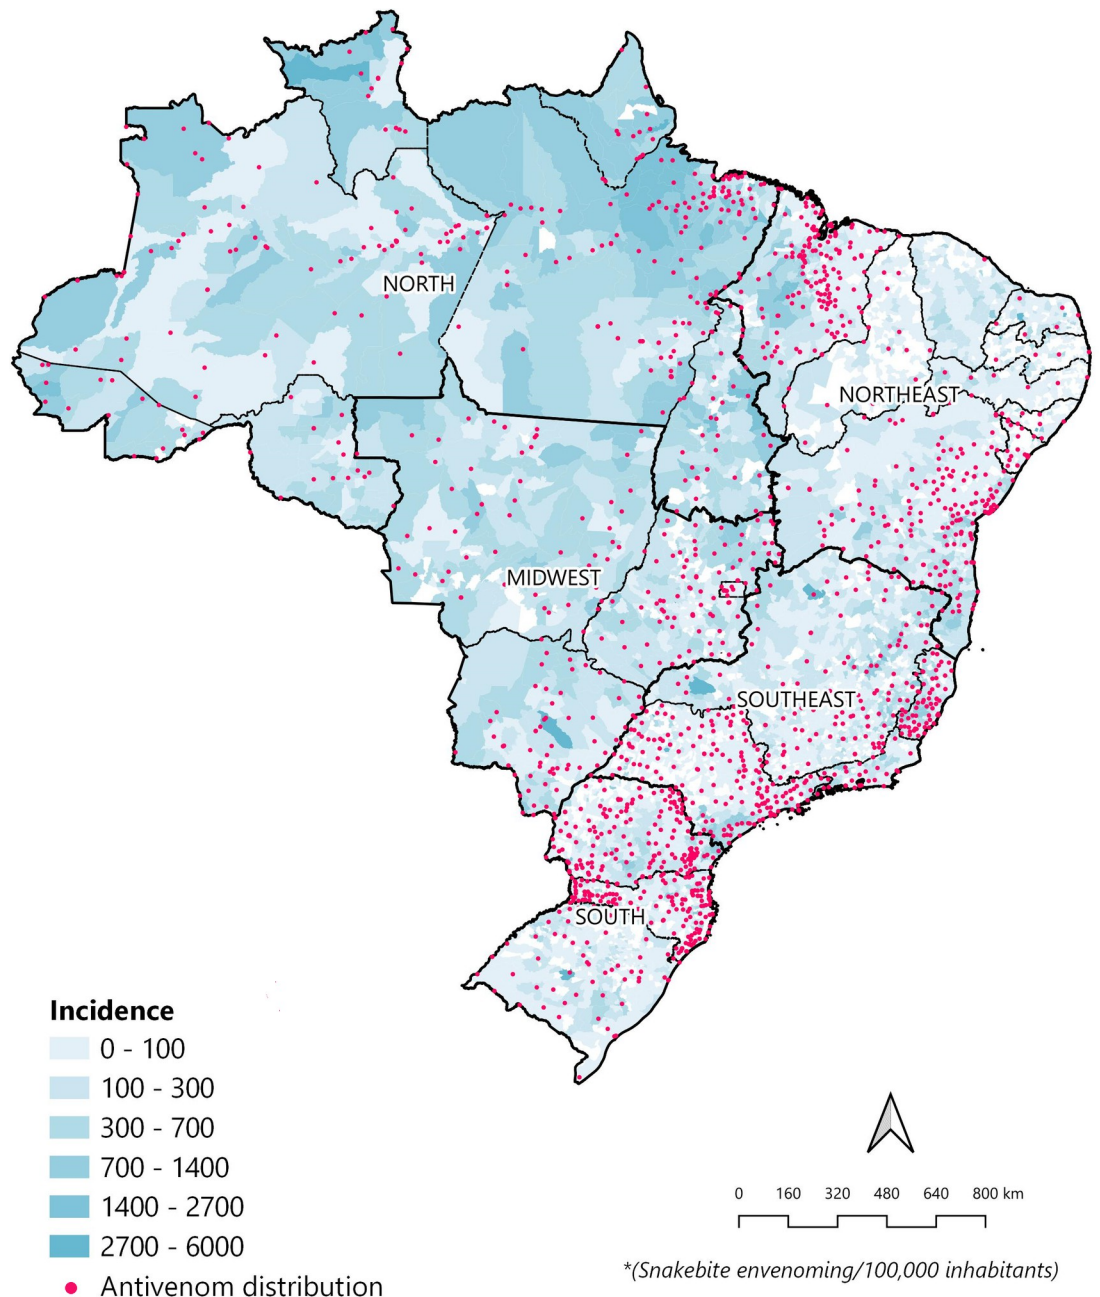

**Fig 5. Spatial distribution of reference health centers for handling *Bothrops* snakebites in Brazil, by incidence of envenoming per municipalities and regions.** The shapefiles for the municipalities, states and country, used for the creation of this map, were extracted from IBGE (<https://www.ibge.gov.br/geociencias/todos-os-produtos-geociencias/15774-malhas.html>). And the shapefile for the points representing the antivenom distribution were created by the authors using the addresses available at <https://www.gov.br/saude/pt-br/assuntos/saude-de-a-a-z/a/animais-peconhentos/hospitais-de-referencia-para-atendimento>.

<https://doi.org/10.1371/journal.pntd.0011708.g005>

A study carried out by Chippaux [2], based on secondary data found in several Health information systems used by American countries, indicated that, in Brazil, between 2007 and 2012, the geographic distribution of the occurrence of envenoming with snakes showed a clear predominance in the North region, especially in the Amazon area, encompassing the states of Amazonas,

Acre, Amapá, Rondônia, Pará and Roraima. However, the occurrence of envenoming according to snake group was not measured, which may be associated with the difficulty in handling a large amount of data for all snake groups that occur in a country such as Brazil [50,62].

Pará led the occurrence of envenoming in the North region during 2012 and 2021, concentrating almost 1/4 of all envenoming with *Bothrops* spp. These results are in line with what Magalhães et al. [63] demonstrated in an epidemiological study in the Amazon region, where between 2010 and 2015 the record cases in the SINAN indicated that most accidents with snakes occurred in the state of Pará (30,693 cases, 43.34%). Several explanations can be triggered to collaborate to this fact. One of them is the diversity in the ecological characteristics of Pará, such as climate conditions, vegetation and large presence of *Bothrops atrox* near inhabited areas, mainly in the rainy season of the year, when the flooding of rivers drives snakes to seek drier places [64], which increases the risk of envenoming [63,65].

At the same time, when we look at Minas Gerais, this state surprisingly takes the second place in the occurrence of envenoming. Possible reasons for the high rates of envenoming by *Bothrops* spp. in this state have not been previously addressed in the literature, however we can suggest some explanation for that. First, despite Minas Gerais is geographically situated in the Southeast of Brazil, the North of the state borders the Northeast of Brazil, and as well-known this region presents high temperatures throughout the year, which align with precipitation rates observed in summer and in the end of spring season, can contribute to the increase of *Bothrops* envenoming as has been seen in others subequatorial countries [66–68].

On the other hand, characteristically, the North of Minas Gerais aggregates risk factors and exposure to snakebites due to its phenomenon of peripheralization of cities and low Human Development Index (HDI), resulting in deficiency in sanitary practices and lack of knowledge of population practices of care and prevention [66,69]. In general, these characteristics allied with the main employment activities in the region such as Agriculture and Livestock may be key determinants for *Bothrops* envenoming [66,70]. However, despite we do not have information about the environmental, socioeconomic and occupational situation of the patients to confirm this inference, we encourage that other epidemiological studies in this state must be carried out.

The upward trend in the occurrence of envenoming with *Bothrops* spp. observed over the years, mainly in the North of the country, may be linked to other factors that go beyond the increase in the occurrence of envenoming. In 2014, Bochner and collaborators [71] theorized that the increase in the occurrence of snakebites in Brazil must also be linked to the improvements that have been implemented in The Brazilian Health Information System regarding the collection, storage and online distribution of epidemiological data and, at the same time, improving access to health services for the victims of envenoming. Furthermore, to the same extent, between 2020 and 2021, for two regions (North and Southeast), a downward trend in occurrence was observed. Perhaps this reduction in the number of cases is related to the non-use of health care centers during Covid-19 pandemic, which devastated unequally the population of Brazil [72].

However, we emphasize that the number of cases of envenoming caused by *Bothrops* spp. between 2020 and 2021 are still under review, and notification errors may have occurred. Nevertheless, by the date of writing this article (May 2023), the numbers of envenoming had not been updated in the SINAN remaining those reported here. A similar situation was observed in a recent study that analyzed envenoming caused by scorpions in Brazil. In it, Guerra-Duarte et al. found that, although the number of reported scorpion accidents was lower in 2020 than in 2019, the number of deaths seems to have skyrocketed, which could be an effect of complications from envenoming not properly treated, since people were avoiding going to health care centers [73].



In 2018, the state of Roraima had the highest average annual incidence seen in Brazil between 2012 and 2021 (70.07 envenoming/100,000 inhabitants). This number can be considered quite high even for the northern region, which throughout the period maintained an average annual incidence above 50 envenoming/100,000 inhabitants, with a slight downward trend over the years. Probably, the observed decline in the incidence of *Bothrops* spp. in the region resulted from population growth, since the occurrence of cases remained approximately constant throughout the period. The incidence of snakebites has been correlated in part by the biology, behavior and abundance of these animals in a region, and on the other hand by human activities in the field that can put entire populations at risk [1,13,74].

For comparison, the average annual incidence of snakebite envenoming in Sri Lanka, a South Asia country with one of the highest incidences linked to snakebite envenoming in the world, corresponds to 180 envenoming/100,000 inhabitants [75]. In Northern Brazil, several municipalities have presented incidence rates of over 100 envenoming per 100,000 inhabitants/year, mainly in the states of Amazonas, Roraima, Pará, Amapá and Tocantins [37].

In a study carried out by Alcântara et al. [37] in the North region, it was evidenced that in Roraima, the municipality of Alto Alegre holds the record for highest incidence rates of envenoming with snakes (358.3 envenoming per 100,000 inhabitants/year), followed by the municipalities of Anajá (338.9 per 100,000 inhabitants/year) and Afuá (303.7 per 100,000 inhabitants/year), in Pará. This reality may be directly linked to the population size of each of these municipalities, the climate conditions and the snake's behavior, and the lack of use of personal protective equipment (PPE) in the daily activities, and not just because of the increase in the frequency of accidental encounters between snakes and humans.

However, these high incidence rates are restricted to a few municipalities, and therefore we can consider that *Bothrops* envenoming are unevenly distributed. According to World Health Organization [11], the incidence measure is rarely uniform in a country or region, since the distribution of snakes varies according to ecological, geographic and environmental parameters. Therefore, climate, human population density, transport networks, land use and habitat must be understood in a broader way [9,11].

The most affected racial groups were directly linked to the racial composition of the population in each of the regions, as well as in other parts of the world [9]. In the North of Brazil, approximately 70% of the population declares itself brown [51], in the Northeast this percentage is equal to 64% and in the Midwest 43%, while in the South and Southeast regions 74% and 59% of the population declare themselves white. Thus, in the North, Northeast and Midwest, the most affected by *Bothrops* spp. are brown, and in the South and Southeast white ( $r = 0.9320$ ,  $P < 0.0001$ ). These findings contribute to other data already published regarding envenoming caused by other groups of snakes and venomous animals with medical importance in Brazil [60,76].

Furthermore, corroborating with previously published epidemiological studies, the population at risk in Brazil is formed mainly by males [2,13,60]. In addition, no significant differences were found for this variable between the regions studied, however, in the North and Northeast, approximately 79% of the patients envenomated by these snakes between 2012 and 2021 are men. This disproportion in the admission of male and female patients to toxicological care centers has been portrayed in the literature for decades as an occupational issue [9], since snake envenoming is closely linked to socioeconomic factors and professional occupation, the most affected being young people and agricultural workers, waste pickers, fishermen and working children [77–80].

In addition, according to the culture of certain countries, the female gender occupies a less prominent place in manual work, historically inherited by men, since women are limited to domestic tasks such as taking care of the house and the children, and therefore, they perform

tasks with less risk of exposure to snakes. This information can be corroborated by a series of epidemiological studies such as those by Ceron [45,74], since both demonstrate, based on the SINAN database, that men are historically the most affected population by snakebite envenoming in Brazil.

Most of patients bitten by *Bothrops* spp. being between 20 and 59 years old must be linked to exposition to this group in daily activities [45], because this is the same age as a large portion of the active population that eventually can perform some function in the field, such as subsistence agriculture [45]. Age is another determining factor for snakebite envenoming, and in fact the involvement of the economically active population by envenoming caused by *Bothrops* spp. can be considered quite worrying, whether due to the temporary loss of labor in the field during the victim's recovery period or even the inability of these workers to return to their jobs permanently due to chronic sequelae [81].

In this way, we can infer that envenoming caused by these snakes is much more a social, economic, and ecological problem than a medical one, as Fry [82] has articulated. Furthermore, unlike what was found by Chippaux [13], who considered all the genus of snakes that occur in Brazil, the specific incidence of envenoming caused by snakes did not increase with age up to 65 years and then decreased, nor did it show the same characteristics in all regions of Brazil. In fact, the occurrence of envenoming by the genus *Bothrops* in Brazil (2012–2021), showed an increasing trend from the first year of age up to 39 years, and then a clear decline, except for the South and Southeast, where the increase in occurrence was seen up to the 40–59 age group.

The 766 deaths notified between 2012 and 2021 and the geographic distribution of most of these notifications being concentrated in the North and Northeast highlight a problem that has been known for a long time, which unfolds mainly in the socioeconomic factors of these regions, and in the lack of attention given by government agencies to issues directly and indirectly related to the envenoming, such as government spending on health promotion, infrastructure, transportation and facilitating access to Antivenom [78].

These problems have had dramatic consequences for different locations, especially those that are more remote and distant from health care center [49]. An example of this is the current situation in the Amazon region, where long distances, low health coverage, the common use of ineffective or deleterious self-care practices and resistance to seeking medical assistance contribute to the mortality and lethality of envenoming with snakes [83], which illustrate our findings and could explain why the North region is precisely the one with the highest mortality rate, with an average equal to 0.14 deaths/100,000 inhabitants.

The anatomical site of the snakebite envenoming is an important variable that must be considered to tracing the clinical profile of the envenoming, since this is the “gateway” of the accident. In it is current global strategy for the prevention and control of snakebites, the World Health Organization has encouraged entire communities through education, especially those living in areas at risk of envenoming, to reduce the chances of snakebites occurrences with simple practices that can be adopted in everyday life, such as the use of shoes, boots and other objects capable of protecting the feet, ankles and legs [9].

There are many causes that culminate in snakebite envenoming. It is already well known that among the parts of the victims' bodies, the extremities of the upper and lower limbs [80] such as feet, legs and hands are the most frequently affected [10]. According to our analyses, more often than not, regardless of the region of the country, most victims of *Bothrops* spp. presented the feet, legs and hands as the site of the sting, showing that envenoming must occur accidentally at inopportune times, and several studies have shown that this can be allied with the lack of the use of PPE in the rural areas and with the behavior of these snakes [65,84,85].

In Santa Cruz (Rio Grande do Norte, RN), a municipality considered a risk area for snakebites due to the already identified high annual incidence rate (up to 450 envenoming/100,000 inhabitants), accidents are almost always caused by *Bothrops erythromelas* [27] and most of the victims identified in an ethnozoological study carried out by Costa [85] claim to be residents of the rural area (77%) and perform some function in the field or in their own home at the time of the accident. In fact, the accidents reported by the interviewed patients occurred while working in the field or in the aviary, hunting in the mountains, caring for farm animals, while cleaning their home or surroundings [85].

In that same study, the most affected body region was the lower limbs, especially the feet. These results, in addition to being related to the activities performed by the patients, seem to be directly linked to the habits that these patients have in their daily lives, such as walking around unprotected or not paying attention while walking in regions where the risk of encountering a snake is high [84]. When questioned about the protection measures used to avoid accidents with snakes in the region, some patients in the municipality of Cruzeiro do Sul (Acre) reported some worrying measures ranging from (i) killing all snakes, (ii) carrying garlic and/or lemon in your pocket, (iii) carrying a weapon, (iv) faith in God, and (v) burning a bull's horn. However, these strategies were not linked to measures that should provide physical protection to the victims' bodies, such as (i) the use of boots, (ii) care and attention when walking, (iii) the use of long pants, (iv) not walking barefoot, (v) avoiding places considered dangerous such as dense forests, (vi) using other personal protective equipment [84].

*Bothrops* snakebites envenoming induces clinical manifestations such as pain, swelling, blister formation, myonecrosis, vascular damage, ischemia, necrosis, and coagulation abnormalities [86–91]. These clinical manifestations are attributed to the venom's composition within this genus, primarily comprising Phospholipases A2 (PLA2s), Serine Proteases (SVSPs), Zinc-dependent Metalloproteases (SVMPs), L-Amino Oxidases (LAAO), Cysteine-Rich Secretory Protein (CRiSP), C-type Lectins (CTL), and Disintegrins (DIS) [19,20,92–94].

Although the high level of intraspecies variability among proteome of *Bothrops* venoms is recognized [18,92,95], the pattern of clinical manifestations, although of variable intensity, suggests the presence of a shared mechanism of tissue degradation, which may result in local complications such as: (a) compartment syndromes, (b) intense local and systemic tissue injury, (c) amputations [96–99], (d) shock, (e) acute pulmonary edema and (f) renal failure [88,100].

In Brazil, most of the envenoming patients between 2012 and 2021 reported pain at the site of the bite. In addition, edema was another local manifestation seen quite frequently in all five regions of Brazil, while ecchymosis and necrosis were present, but in smaller proportions. Following that, the most common systemic manifestations were linked to vomiting and diarrhea (vagal) and bleeding disorders, and systemic complications were rarely observed, in all regions the average of patients with systemic complications was less than 1%. These clinical manifestations are linked to the main mechanisms of action of *Bothrops* spp. venom, but also with the time between the envenoming and the administration of the Antivenom treatment, the use of traditional medicine and inadequate practices [10,65,82,97,98,101,102].

The time between envenoming and the first medical care is another important variable that is directly related to high rates of therapeutic success in the treatment of patients bites by *Bothrops* spp., that can be observed because the Antivenom therapies available can neutralize circulating toxins in human blood plasma [103]. Once that the success of treatment is closely tied to the promptness of medical care following snake envenoming. Therefore, the therapeutic itinerary taken by patients significantly influences their timely arrival at a toxicological care health center. Our findings indicate that, in the North region of Brazil, there is a higher prevalence of individuals affected by envenoming who arrive at the health care center after a span of

3 hours compared to other regions. These results further underscore the association between delayed medical attention and the region's disproportionately elevated rates of mortality and lethality, which are up to 10 times higher compared to other regions of Brazil.

In a study that evaluated the therapeutic itinerary of 30 patients who lived in remote areas of the Amazon region [49], where access to Antivenoms is not guaranteed for these populations considered invisible [83], it was observed a great fragmentation in the itineraries of these patients, which was marked by several changes of means of transport along the route, in addition to the patients' resistance to seek medical help. Some patients who lived more than 500 km away from the capital Manaus taking up to 96 hours to get to the toxicological care center, mainly due to the problems encountered during the journey, almost always done in motorboats, canoes, motorcycles, cars and planes [49].

Delay in medical care was reported by seventeen participants (57%) [49]. This profile was replicated, mainly, in the North and in the Northeast in 2012 and 2021. On the other hand, unlike that in the South and Southeast regions, throughout the period most patients arrived at the health care center even before completing the first hour after envenoming, which is directly related to better mobility conditions and accessibility to quality health services in these regions. While in the North and Northeast, two historically neglected regions of the country, a large percentage of patients took an average of up to 3 hours to arrive at the health care center that provided adequate Antivenom therapy to treat the envenoming.

## 5. Limitations

One significant concern pertains to the data collection process. All data obtained from SINAN is subject to review by the healthcare professionals responsible for providing and updating the epidemiological information in this system. The accuracy of this information is directly influenced by the process of identifying the biting snake, which depends on the memories of the patients and/or their relatives, or some record of the animal. Even when the animal is registered, there is often a lack of qualified agents to carry out an accurate identification of the snake at health centers, culminating in a possible sampling bias. Accurate identification of venomous snakes remains one of the biggest problems encountered worldwide, including in Brazil [104]. In addition, patients affected by *Bothrops* snakebite envenoming may decide not to go to the health centers to receive proper care, which masks the real epidemiological situation in the country and generates a large underreporting of cases. In this sense, we have provided an overview of the epidemiological situation *Bothrops* snakebite envenoming in Brazil, based on the data publicly available on SINAN. Although unfortunately our results may do not necessarily reflect the reality of the disease in the country, due to the limitations pointed out here, we believe that we have presented a careful approximation of this historical health problem, which disproportionately affects the population who lives in the shadows of neglect.

## 6. Concluding remarks

In Brazil, *Bothrops* snakebite envenoming is, in particular, an important cause of morbidity and mortality. Between 2012 and 2021, an extensive 202,604 instances of *Bothrops* snakebites were reported in SINAN. Our study findings demonstrated that the prevalence and incidence of envenoming were notably concentrated in the North region, followed by the Northeast and Southeast regions. The demographic characteristics of the population affected by *Bothrops* envenoming exhibited considerable heterogeneity based on the country's regions. However, these outcomes consistently aligned with demographic data provided by IBGE. Notably, the North, Northeast, and Midwest regions reported higher proportions of patients self-identifying as brown, while in the South and Southeast regions, the majority identified as white.

Moreover, a predominant male patient demographic was observed nationwide. Throughout the study period, there were 766 documented deaths attributed to complications arising from *Bothrops* spp. envenoming. More than half of these fatalities occurred in the North and North-east regions, where delayed access to specialized care, particularly in rural areas, was prevalent due to the concentration of Antivenom in urban centers. This delay has been correlated with elevated mortality and lethality rates, as evidenced by other epidemiological studies focused on specific states within these regions. When comparing regions, the North emerged as the most region affected by *Bothrops* spp. envenoming, exhibiting annual mortality and lethality rates up to ten times greater than those observed in the South region.

Furthermore, our results revealed a consistent clinical profile among patients. This uniformity is attributed to the shared manifestations and clinical complications, primarily centered around pain, edema, and coagulation disorders induced by *Bothrops* venoms. Left untreated, these symptoms pose a significant risk of progressing into severe tissue damage and functional limb loss, often necessitating amputations. Our study underscored the vital role of a robustly functioning SINAN system and the pressing need for *Bothrops* envenoming to be mandatorily reported. This imperative action can pave the way for essential health indicators that aid in disease prevention and management. Moreover, the data prompts us to question the heightened intensity of *Bothrops* envenoming in remote rural areas, which often lack adequate healthcare facilities. Concurrently, there is a need to educate communities on appropriate actions to treat snakebite envenoming. This situation prompts us to advocate for an urgent call to action from authorities and health organizations to enhance therapeutic provisions, including the equitable distribution of Antivenoms in historically "invisible" areas such as the Amazon region.

## Supporting information

**S1 Data. Database organized by the authors from secondary data in the public domain by The Brazilian Notifiable Diseases Information System of the Brazilian Ministry of Health.** (XLSX)

**S2 Data. List of Health care center that provides *Bothrops* Antivenom therapy on Brazil.** (XLSX)

## Acknowledgments

We would like to express our thanks to Institutional Program to Support Scientific Production in Graduate Studies at Paraiba State University (UEPB).

## Author Contributions

**Conceptualization:** Wesley Ruan Guimarães Borges da Silva.

**Data curation:** Wesley Ruan Guimarães Borges da Silva, Lucas de Siqueira Santos.

**Formal analysis:** Wesley Ruan Guimarães Borges da Silva.

**Funding acquisition:** Rômulo Romeu Nóbrega Alves.

**Investigation:** Wesley Ruan Guimarães Borges da Silva.

**Methodology:** Wesley Ruan Guimarães Borges da Silva, Lucas de Siqueira Santos.

**Project administration:** Wesley Ruan Guimarães Borges da Silva.

**Resources:** Wesley Ruan Guimarães Borges da Silva.

**Software:** Lucas de Siqueira Santos.



**Supervision:** Wesley Ruan Guimarães Borges da Silva, Rômulo Romeu Nóbrega Alves.

**Validation:** Derick Lira, Rômulo Romeu Nóbrega Alves.

**Visualization:** Wesley Ruan Guimarães Borges da Silva.

**Writing – original draft:** Wesley Ruan Guimarães Borges da Silva.

**Writing – review & editing:** Wesley Ruan Guimarães Borges da Silva, Lucas de Siqueira Santos, Derick Lira, Karla Patrícia de Oliveira Luna, Sayonara Maria Lia Fook, Rômulo Romeu Nóbrega Alves.

## References

1. Chippaux J-P. Snakebite envenomation turns again into a neglected tropical disease! *J Venom Anim Toxins Trop Dis*. 2017; 23: 38. <https://doi.org/10.1186/s40409-017-0127-6> PMID: 28804495
2. Chippaux J-P. Incidence and mortality due to snakebite in the Americas. *PLoS Negl Trop Dis*. 2017; 11: e0005662. <https://doi.org/10.1371/journal.pntd.0005662> PMID: 28636631
3. Longbottom J, Shearer FM, Devine M, Alcoba G, Chappuis F, Weiss DJ, et al. Vulnerability to snakebite envenoming: a global mapping of hotspots. *Lancet Lond Engl*. 2018; 392: 673–684. [https://doi.org/10.1016/S0140-6736\(18\)31224-8](https://doi.org/10.1016/S0140-6736(18)31224-8) PMID: 30017551
4. Lancet The. Snakebite-emerging from the shadows of neglect. *Lancet Lond Engl*. 2019; 393: 2175. [https://doi.org/10.1016/S0140-6736\(19\)31232-2](https://doi.org/10.1016/S0140-6736(19)31232-2) PMID: 31162065
5. Roberts NLS, Johnson EK, Zeng SM, Hamilton EB, Abdoli A, Alahdab F, et al. Global mortality of snakebite envenoming between 1990 and 2019. *Nat Commun*. 2022; 13: 6160. <https://doi.org/10.1038/s41467-022-33627-9> PMID: 36284094
6. Braga JRM, Souza MMC de, Melo IML de A, Faria LEM, Jorge RJB. Epidemiology of accidents involving venomous animals in the State of Ceará, Brazil (2007–2019). *Rev Soc Bras Med Trop*. 2021; 54: e05112020. <https://doi.org/10.1590/0037-8682-0511-2020> PMID: 33605378
7. Lancet The. Snake-bite envenoming: a priority neglected tropical disease. *Lancet Lond Engl*. 2017; 390: 2. [https://doi.org/10.1016/S0140-6736\(17\)31751-8](https://doi.org/10.1016/S0140-6736(17)31751-8) PMID: 28677550
8. Warrell DA. Venomous Bites, Stings, and Poisoning: An Update. *Infect Dis Clin North Am*. 2019; 33: 17–38. <https://doi.org/10.1016/j.idc.2018.10.001> PMID: 30712761
9. World Health Organization. Snakebite envenoming: a strategy for prevention and control. Geneva: World Health Organization; 2019. Available: <https://iris.who.int/handle/10665/324838>
10. Gutiérrez JM, Calvete JJ, Habib AG, Harrison RA, Williams DJ, Warrell DA. Snakebite envenoming. *Nat Rev Dis Primer*. 2017; 3: 17063. <https://doi.org/10.1038/nrdp.2017.63> PMID: 28905944
11. World Health Organization. Addressing the burden of snakebite envenoming. 2018.
12. da Graça Salomão M, de Oliveira Luna KP, Machado C. [Epidemiology of accidents by venomous animals and distribution of antivenom: state of art and world status]. *Rev Salud Publica Bogota Colomb*. 2018; 20: 523–529. <https://doi.org/10.15446/rsap.V20n4.70432> PMID: 30843991
13. Chippaux J-P. Epidemiology of envenomations by terrestrial venomous animals in Brazil based on case reporting: from obvious facts to contingencies. *J Venom Anim Toxins Trop Dis*. 2015; 21: 1–17. <https://doi.org/10.1186/s40409-015-0011-1> PMID: 26042152
14. Chippaux J-P, Massougoudji A, Habib AG. The WHO strategy for prevention and control of snakebite envenoming: a sub-Saharan Africa plan. *J Venom Anim Toxins Trop Dis*. 2019; 25: e20190083. <https://doi.org/10.1590/1678-9199-JVATITD-2019-0083> PMID: 31839803
15. Minghui R, Malecela MN, Cooke E, Abela-Ridder B. WHO's Snakebite Envenoming Strategy for prevention and control. *Lancet Glob Health*. 2019; 7: e837–e838. [https://doi.org/10.1016/S2214-109X\(19\)30225-6](https://doi.org/10.1016/S2214-109X(19)30225-6) PMID: 31129124
16. Tavares AV, Araújo KAM de, Marques MR de V, Leite R. Epidemiology of the injury with venomous animals in the state of Rio Grande do Norte, Northeast of Brazil. *Cienc Saude Coletiva*. 2020; 25: 1967–1978. <https://doi.org/10.1590/1413-81232020255.16572018> PMID: 32402034
17. Alcoba G, Ochoa C, Babo Martins S, Ruiz de Castañeda R, Bolon I, Wanda F, et al. Novel transdisciplinary methodology for cross-sectional analysis of snakebite epidemiology at national scale. *PLoS Negl Trop Dis*. 2021; 15: e0009023. <https://doi.org/10.1371/journal.pntd.0009023> PMID: 33577579
18. Jorge RJB, Monteiro HSA, Gonçalves-Machado L, Guarnieri MC, Ximenes RM, Borges-Nojosa DM, et al. Venomics and antivenomics of *Bothrops erythromelas* from five geographic populations within

- the Caatinga ecoregion of northeastern Brazil. *J Proteomics*. 2015; 114: 93–114. <https://doi.org/10.1016/j.jprot.2014.11.011> PMID: 25462430
19. Tasoulis T, Isbister GK. A Review and Database of Snake Venom Proteomes. *Toxins*. 2017; 9: 290. <https://doi.org/10.3390/toxins9090290> PMID: 28927001
  20. Hatakeyama DM, Tasima LJ, Bravo-Tobar CA, Serino-Silva C, Tashima AK, Rodrigues CFB, et al. Venom complexity of *Bothrops atrox* (common lancehead) siblings. *J Venom Anim Toxins Trop Dis*. 2020; 26: e20200018. <https://doi.org/10.1590/1678-9199-JVATITD-2020-0018> PMID: 33101399
  21. da Silva-Júnior LN, Abreu L de S, Rodrigues CFB, Galizio N da C, Aguiar W da S, Serino-Silva C, et al. Geographic variation of individual venom profile of *Crotalus durissus* snakes. *J Venom Anim Toxins Trop Dis*. 2020; 26: e20200016. <https://doi.org/10.1590/1678-9199-JVATITD-2020-0016> PMID: 32922444
  22. Vikrant S, Jaryal A, Gupta D, Parashar A. Epidemiology and outcome of acute kidney injury due to venomous animals from a subtropical region of India. *Clin Toxicol Phila Pa*. 2019; 57: 240–245. <https://doi.org/10.1080/15563650.2018.1513526> PMID: 30306815
  23. Patra A, Mukherjee AK. Assessment of snakebite burdens, clinical features of envenomation, and strategies to improve snakebite management in Vietnam. *Acta Trop*. 2021; 216: 105833. <https://doi.org/10.1016/j.actatropica.2021.105833> PMID: 33485869
  24. Bravo-Vega CA, Cordovez JM, Renjifo-Ibáñez C, Santos-Vega M, Sasa M. Estimating snakebite incidence from mathematical models: A test in Costa Rica. *PLoS Negl Trop Dis*. 2019; 13: e0007914. <https://doi.org/10.1371/journal.pntd.0007914> PMID: 31790407
  25. Braitberg G, Nimorakiotakis V, Yap CYL, Mukaro V, Welton R, Parker A, et al. The Snake Study: Survey of National Attitudes and Knowledge in Envenomation. *Toxins*. 2021; 13: 482. <https://doi.org/10.3390/toxins13070482> PMID: 34357954
  26. De Marco Almeida F, de Castro Pimenta AM, Oliveira MC, De Lima ME. Venoms, toxins and derivatives from the Brazilian fauna: valuable sources for drug discovery. *Sheng Li Xue Bao*. 2015; 67: 261–270. PMID: 26109299
  27. Costa MKB da, Fonseca CS da, Navoni JA, Freire EMX. Snakebite accidents in Rio Grande do Norte state, Brazil: Epidemiology, health management and influence of the environmental scenario. *Trop Med Int Health TM IH*. 2019; 24: 432–441. <https://doi.org/10.1111/tmi.13207> PMID: 30659709
  28. Melo Araújo SC, Ceron K, Guedes TB. Use of geospatial analyses to address snakebite hotspots in mid-northern Brazil—A direction to health planning in shortfall biodiversity knowledge areas. *Toxicon Off J Int Soc Toxinology*. 2022; 213: 43–51. <https://doi.org/10.1016/j.toxicon.2022.03.012> PMID: 35390425
  29. Wen FH, Monteiro WM, Scheidt JF, Andrade L, Ye J, Staton CA, et al. Geographical distribution and health care disparities of scorpion stings in Brazil. *Toxicon*. 2020; 182: S24–S25. <https://doi.org/10.1016/j.toxicon.2020.04.060>
  30. Almeida ACC de Mise YF, Carvalho FM, Silva RML da. Ecological association between socioeconomic, occupational and sanitation factors and the occurrence of scorpionism in Brazil, 2007–2019. *Epidemiol E Serv Saude Rev Sist Unico Saude Bras*. 2021; 30: e2021009. <https://doi.org/10.1590/S1679-49742021000400021> PMID: 34854465
  31. SINAN. Notificações registradas no Sistema de Informação de Agravos de Notificação—Brasil. [cited 10 Apr 2022]. Available: <http://tabnet.datasus.gov.br/cgi/deftohtm.exe?sinanet/cnv/animaisbr.def>
  32. SINAN. SINAN Net. [cited 20 May 2022]. Available: <http://portalsinan.saude.gov.br/sinan-net>
  33. The Reptile Database. Superfamily Colubroidea, Family Viperidae. [cited 20 Oct 2022]. Available: <http://www.reptile-database.org/>
  34. Campbell JA, Lamar WW. The Venomous Reptiles of Latin America. [cited 9 Oct 2023]. Available: <https://www.abebooks.com/9780801420597/Venomous-Reptiles-Latin-America-Campbell-0801420598/plp>
  35. Barbo FE, Booker WW, Duarte MR, Chaluppe B, Portes-Junior JA, Franco FL, et al. Speciation process on Brazilian continental islands, with the description of a new insular lancehead of the genus *Bothrops* (Serpentes, Viperidae). *Syst Biodivers*. 2022; 20: 1–25. <https://doi.org/10.1080/14772000.2021.2017059>
  36. Barbo FE, Grazziotin FG, Pereira-Filho GA, Freitas MA, Abrantes SHF, Kokubum MNDC. Isolated by dry lands: integrative analyses unveil the existence of a new species and a previously unknown evolutionary lineage of Brazilian Lanceheads (Serpentes: Viperidae: Bothrops) from a Caatinga moist-forest enclave. *Can J Zool*. 2022; 100: 147–159. <https://doi.org/10.1139/cjz-2021-0131>
  37. Alcântara JA, Bernarde PS, Sachett J, da Silva AM, Valente SF, Peixoto HM, et al. Stepping into a dangerous quagmire: Macroecological determinants of *Bothrops* envenomings, Brazilian Amazon. *PLoS One*. 2018; 13: e0208532. <https://doi.org/10.1371/journal.pone.0208532> PMID: 30521617

38. de Oliveira SS, de Souza Sampaio V, de Almeida Gonçalves Sachett J, Campos Alves E, da Silva VC, Alcântara de Lima JA et al. Snakebites in the Brazilian Amazon: Current Knowledge and Perspectives. In: Vogel C-W, Seifert SA, Tambourgi DV, editors. *Clinical Toxinology in Australia, Europe, and Americas*. Dordrecht: Springer Netherlands; 2018. pp. 73–99. [https://doi.org/10.1007/978-94-017-7438-3\\_61](https://doi.org/10.1007/978-94-017-7438-3_61)
39. Hui Wen F, Monteiro WM, Moura da Silva AM, Tambourgi DV, Mendonça da Silva I, Sampaio VS, et al. Snakebites and scorpion stings in the Brazilian Amazon: identifying research priorities for a largely neglected problem. *PLoS Negl Trop Dis*. 2015; 9: e0003701. <https://doi.org/10.1371/journal.pntd.0003701> PMID: 25996940
40. Lira-da-Silva RM, Mise YF, Casais-e-Silva LL, Ulloa J, Hamdan B. Snakes of medical importance in Northeast of Brazil.
41. Oliveira FN, Brito MT, Morais ICO de, Fook SML, Albuquerque HN de. Accidents caused by Bothrops and Bothropoides in the State of Paraíba: epidemiological and clinical aspects. *Rev Soc Bras Med Trop*. 2010; 43: 662–667. <https://doi.org/10.1590/s0037-86822010000600012> PMID: 21181019
42. Albuquerque PLMM Paiva JHHGL, Martins AMC Meneses GC, da Silva GB, Buckley N, et al. Clinical assessment and pathophysiology of Bothrops venom-related acute kidney injury: a scoping review. *J Venom Anim Toxins Trop Dis*. 2020; 26: e20190076. <https://doi.org/10.1590/1678-9199-JVATITD-2019-0076> PMID: 32704246
43. Dias GS, Kitano ES, Pagotto AH, Sant'anna SS, Rocha MMT, Zelanis A, et al. Individual variability in the venom proteome of juvenile Bothrops jararaca specimens. *J Proteome Res*. 2013; 12: 4585–4598. <https://doi.org/10.1021/pr4007393> PMID: 23998483
44. Gonçalves-Machado L, Pla D, Sanz L, Jorge RJB, Leitão-De-Araújo M, Alves MLM, et al. Combined venomomics, venom gland transcriptomics, bioactivities, and antivenomics of two Bothrops jararaca populations from geographic isolated regions within the Brazilian Atlantic rainforest. *J Proteomics*. 2016; 135: 73–89. <https://doi.org/10.1016/j.jprot.2015.04.029> PMID: 25968638
45. Ceron K, Vieira C, Carvalho PS, Carrillo JFC, Alonso J, Santana DJ. Epidemiology of snake envenomation from Mato Grosso do Sul, Brazil. *PLoS Negl Trop Dis*. 2021; 15: e0009737. <https://doi.org/10.1371/journal.pntd.0009737> PMID: 34495969
46. Brasil. Sistemas de informação em saúde. In: Ministério da Saúde [Internet]. [cited 9 Oct 2022]. Available: <https://www.gov.br/saude/pt-br/composicao/svsa/vigilancia-de-doencas-cronicas-nao-transmissiveis/sistemas-de-informacao-em-saude>
47. Brasil. Portaria no 1882/GM\*Em, 18 de dezembro de 1997. 1997.
48. Citeli N, Cavalcante MM, Magalhães MA, Bochner R. Lista dos Polos de Soro para atendimento de acidentes ofídicos no Brasil.
49. Cristino JS, Salazar GM, Machado VA, Honorato E, Farias AS, Vissoci JRN, et al. A painful journey to antivenom: The therapeutic itinerary of snakebite patients in the Brazilian Amazon (The QUALISnake Study). *PLoS Negl Trop Dis*. 2021; 15: e0009245. <https://doi.org/10.1371/journal.pntd.0009245> PMID: 33661895
50. IBGE. Áreas Territoriais | IBGE. [cited 10 Jun 2023]. Available: <https://www.ibge.gov.br/geociencias/organizacao-do-territorio/estrutura-territorial/15761-areas-dos-municipios.html>
51. IBGE. Estatísticas social. [cited 20 Oct 2022]. Available: <https://www.ibge.gov.br/na/statistics/social/labor/18391-2010-population-census.html?=&t=destaques>
52. IBGE. Conheça o Brasil-População Educação. In: IBGE Educa Jovens [Internet]. [cited 20 Oct 2022]. Available: <https://educa.ibge.gov.br/jovens.html>
53. IBGE. IBGE explica. [cited 20 Oct 2022]. Available: <https://www.ibge.gov.br/explica/pib.php>
54. FUNASA. Manual de diagnóstico e tratamento de acidentes por animais peçonhentos. 2001.
55. Brasil. Guia de Vigilância em Saúde. 5th ed. Brasília, DF: Ministério da Saúde; 2022.
56. Fletcher RH. *Epidemiologia Clínica: Elementos Essenciais*. 5a edição. Artmed; 2014.
57. Jenks GF. *The Data Model Concept in Statistical Mapping*. 7th ed. International Yearbook of Cartography. 7th ed. 1967.
58. Brasil. Hospitais de Referência para Atendimento. In: Ministério da Saúde [Internet]. [cited 11 May 2023]. Available: <https://www.gov.br/saude/pt-br/assuntos/saude-de-a-a-z/a/animais-peconhentos/hospitais-de-referencia>
59. Vilimpoc M, Toth C, Aylott T, Shih A, Davies J. Google Sheets Geocoding Macro Toth, C.; Aylott, T.; Shih, A.; Davies, J. [cited 11 Jul 2023]. Available: <https://github.com/nuket/google-sheets-geocoding-macro>
60. Silva AM da, Bernarde PS, Abreu LC de. Accidents with poisonous animals in Brazil by age and sex. *J Hum Growth Dev*. 2015; 25: 54–62. <https://doi.org/10.7322/jhgd.96768>

61. Schneider MC, Min K-D, Hamrick PN, Montebello LR, Ranieri TM, Mardini L, et al. Overview of snakebite in Brazil: Possible drivers and a tool for risk mapping. *PLoS Negl Trop Dis.* 2021; 15: e0009044. <https://doi.org/10.1371/journal.pntd.0009044> PMID: 33513145
62. Chippaux J-P. Control of ophidism in Brazil: a model for Africa. *J Venom Anim Toxins Trop Dis.* 2010; 16: 188–190. <https://doi.org/10.1590/S1678-91992010000200001>
63. Magalhães SFV, Peixoto HM, Moura N, Monteiro WM, de Oliveira MRF. Snakebite envenomation in the Brazilian Amazon: a descriptive study. *Trans R Soc Trop Med Hyg.* 2019; 113: 143–151. <https://doi.org/10.1093/trstmh/try121> PMID: 30476298
64. Turci LCB, Albuquerque S de, Bernarde PS, Miranda DB. Uso do hábitat, atividade e comportamento de *Bothriopsis bilineatus* e de *Bothrops atrox* (Serpentes: Viperidae) na floresta do Rio Moa, Acre, Brasil. *Biota Neotropica.* 2009; 9: 197–206. <https://doi.org/10.1590/S1676-06032009000300020>
65. da Silva AM, Colombini M, Moura-da-Silva AM, de Souza RM, Monteiro WM, Bernarde PS. Ethno-knowledge and attitudes regarding snakebites in the Alto Juruá region, Western Brazilian Amazonia. *Toxicon Off J Int Soc Toxinology.* 2019; 171: 66–77. <https://doi.org/10.1016/j.toxicon.2019.10.238> PMID: 31628968
66. Chaves LF, Chuang T-W, Sasa M, Gutiérrez JM. Snakebites are associated with poverty, weather fluctuations, and El Niño. *Sci Adv.* 2015; 1: e1500249. <https://doi.org/10.1126/sciadv.1500249> PMID: 26601254
67. Martín G, Erinjery J, Gumbs R, Somaweera R, Ediriweera D, Diggle PJ, et al. Integrating snake distribution, abundance and expert-derived behavioural traits predicts snakebite risk. *J Appl Ecol.* 2022; 59: 611–623. <https://doi.org/10.1111/1365-2664.14081>
68. Martín G, Erinjery JJ, Ediriweera D, de Silva HJ, Lalloo DG, Iwamura T, et al. A mechanistic model of snakebite as a zoonosis: Envenoming incidence is driven by snake ecology, socioeconomics and its impacts on snakes. *PLoS Negl Trop Dis.* 2022; 16: e0009867. <https://doi.org/10.1371/journal.pntd.0009867> PMID: 35551272
69. Goldstein E, Erinjery JJ, Martín G, Kasturiratne A, Ediriweera DS, de Silva HJ, et al. Integrating human behavior and snake ecology with agent-based models to predict snakebite in high risk landscapes. *PLoS Negl Trop Dis.* 2021; 15: e0009047. <https://doi.org/10.1371/journal.pntd.0009047> PMID: 33481802
70. Babo Martins S, Bolon I, Chappuis F, Ray N, Alcoba G, Ochoa C, et al. Snakebite and its impact in rural communities: The need for a One Health approach. *PLoS Negl Trop Dis.* 2019; 13: e0007608. <https://doi.org/10.1371/journal.pntd.0007608> PMID: 31557159
71. Bochner R, Fizon JT, Machado C. A Profile of Snake Bites in Brazil, 2001 to 2012. *Res Artic.* 2014;4. <https://doi.org/10.4172/2161-0495.1000194>
72. Castro MC, Kim S, Barberia L, Ribeiro AF, Gurzenda S, Ribeiro KB, et al. Spatiotemporal pattern of COVID-19 spread in Brazil. *Science.* 2021; 372: 821–826. <https://doi.org/10.1126/science.abh1558> PMID: 33853971
73. Guerra-Duarte C, Saavedra-Langer R, Matavel A, Oliveira-Mendes BBR, Chavez-Olortegui C, Paiva ALB. Scorpion envenomation in Brazil: Current scenario and perspectives for containing an increasing health problem. *PLoS Negl Trop Dis.* 2023; 17: e0011069. <https://doi.org/10.1371/journal.pntd.0011069> PMID: 36757916
74. Bochner R, Struchiner CJ. Epidemiologia dos acidentes ofídicos nos últimos 100 anos no Brasil: uma revisão. *Cad Saúde Pública.* 2003; 19: 07–16. <https://doi.org/10.1590/S0102-311X2003000100002> PMID: 12700779
75. Gutiérrez JM, Maduwage K, Ilyasu G, Habib A. Snakebite envenoming in different national contexts: Costa Rica, Sri Lanka, and Nigeria. *Toxicon X.* 2021; 9–10: 100066. <https://doi.org/10.1016/j.toxcx.2021.100066> PMID: 34124644
76. Favalesso MM, Cuervo PF, Casafús MG, Guimarães ATB, Peichoto ME. Lononia envenomation in Brazil: an epidemiological overview for the period 2007–2018. *Trans R Soc Trop Med Hyg.* 2021; 115: 9–19. <https://doi.org/10.1093/trstmh/traa051> PMID: 32945864
77. Kasturiratne A, Wickremasinghe AR, de Silva N, Gunawardena NK, Pathmeswaran A, Premaratna R, et al. The global burden of snakebite: a literature analysis and modelling based on regional estimates of envenoming and deaths. *PLoS Med.* 2008; 5: e218. <https://doi.org/10.1371/journal.pmed.0050218> PMID: 18986210
78. Harrison RA, Hargreaves A, Wagstaff SC, Faragher B, Lalloo DG. Snake envenoming: a disease of poverty. *PLoS Negl Trop Dis.* 2009; 3: e569. <https://doi.org/10.1371/journal.pntd.0000569> PMID: 20027216
79. Kasturiratne A, Pathmeswaran A, Wickremasinghe AR, Jayamanne SF, Dawson A, Isbister GK, et al. The socio-economic burden of snakebite in Sri Lanka. *PLoS Negl Trop Dis.* 2017; 11: e0005647. <https://doi.org/10.1371/journal.pntd.0005647> PMID: 28683119

80. Seifert SA, Armitage JO, Sanchez EE. Snake Envenomation. *N Engl J Med*. 2022; 386: 68–78. <https://doi.org/10.1056/NEJMra2105228> PMID: 34986287
81. Kasturiratne A, Lalloo DG, Janaka de Silva H. Chronic health effects and cost of snakebite. *Toxicon X*. 2021; 9–10: 100074. <https://doi.org/10.1016/j.toxcx.2021.100074> PMID: 34355162
82. Fry BG. Snakebite: When the Human Touch Becomes a Bad Touch. *Toxins*. 2018; 10: 170. <https://doi.org/10.3390/toxins10040170> PMID: 29690533
83. Salazar GKM, Cristino JS, Silva-Neto AV, Farias AS, Alcântara JA, Machado VA, et al. Snakebites in “Invisible Populations”: A cross-sectional survey in riverine populations in the remote western Brazilian Amazon. *PLoS Negl Trop Dis*. 2021; 15: e0009758. <https://doi.org/10.1371/journal.pntd.0009758> PMID: 34499643
84. Silva JL da, Fonseca WL da, Mota da Silva A, Amaral GLG do, Ortega GP, Oliveira A de S, et al. Venomous snakes and people in a floodplain forest in the Western Brazilian Amazon: Potential risks for snakebites. *Toxicon Off J Int Soc Toxicology*. 2020; 187: 232–244. <https://doi.org/10.1016/j.toxicon.2020.09.007> PMID: 32979388
85. Costa MKB da, Alves RRN, Navoni JA, Freire EMX. Ethnozoology of snakebite victims in a risk area in Northeast Brazil. *Toxicon Off J Int Soc Toxicology*. 2021; 201: 155–163. <https://doi.org/10.1016/j.toxicon.2021.08.021> PMID: 34454970
86. Luna KPO, da Silva MB, Pereira VRA. Clinical and immunological aspects of envenomations by *Bothrops* snakes. *J Venom Anim Toxins Trop Dis*. 2011; 17: 130–141. <https://doi.org/10.1590/S1678-91992011000200003>
87. Nery NM, Setúbal SS, Boeno CN, Lopes JA, Paloschi MV, Pontes AS, et al. *Bothrops erythromelas* venom and its action on isolated murine macrophages. *Toxicon*. 2020; 185: 156–163. <https://doi.org/10.1016/j.toxicon.2020.07.017> PMID: 32702355
88. Silva de Oliveira S, Campos Alves E, Santos AS, Nascimento E, Pereira JP, Silva I, et al. Bleeding Disorders in *Bothrops atrox* Envenomations in the Brazilian Amazon: Participation of Hemostatic Factors and the Impact of Tissue Factor. *Toxins*. 2020; 12: 554. <https://doi.org/10.3390/toxins12090554> PMID: 32872404
89. Silva de Oliveira S, Campos Alves E, Dos Santos Santos A, Freitas Nascimento E, Tavares Pereira JP, Mendonça da Silva I, et al. *Bothrops* snakebites in the Amazon: recovery from hemostatic disorders after Brazilian antivenom therapy. *Clin Toxicol Phila Pa*. 2020; 58: 266–274. <https://doi.org/10.1080/15563650.2019.1634273> PMID: 31264481
90. Silva de Oliveira SS, Alves EC, Santos AS, Pereira JPT, Sarraff LKS, Nascimento EF, et al. Factors Associated with Systemic Bleeding in *Bothrops* Envenomation in a Tertiary Hospital in the Brazilian Amazon. *Toxins*. 2019; 11: 22. <https://doi.org/10.3390/toxins11010022> PMID: 30621001
91. Cavalcante JS, Borges da Silva WRG, de Oliveira LA, Brito IMC, Muller KS, J Vidal IS, et al. Blood plasma proteome alteration after local tissue damage induced by *Bothrops erythromelas* snake venom in mice. *J Proteomics*. 2022; 269: 104742. <https://doi.org/10.1016/j.jprot.2022.104742> PMID: 36174952
92. Oliveira AL, Viegas MF, da Silva SL, Soares AM, Ramos MJ, Fernandes PA. The chemistry of snake venom and its medicinal potential. *Nat Rev Chem*. 2022; 6: 451–469. <https://doi.org/10.1038/s41570-022-00393-7> PMID: 35702592
93. Monteiro WM, Contreras-Bernal JC, Bisneto PF, Sachett J, Mendonça da Silva I, Lacerda M, et al. *Bothrops atrox*, the most important snake involved in human envenomings in the amazon: How venomomics contributes to the knowledge of snake biology and clinical toxicology. *Toxicon X*. 2020; 6: 100037. <https://doi.org/10.1016/j.toxcx.2020.100037> PMID: 32550592
94. Hatakeyama DM, Tasima LJ, Galizio N da C, Serino-Silva C, Rodrigues CFB, Stuginski DR, et al. From birth to adulthood: An analysis of the Brazilian lancehead (*Bothrops moojeni*) venom at different life stages. *PLOS ONE*. 2021; 16: e0253050. <https://doi.org/10.1371/journal.pone.0253050> PMID: 34111213
95. Gren ECK, Kitano ES, Andrade-Silva D, Iwai LK, Reis MS, Menezes MC, et al. Comparative analysis of the high molecular mass subproteomes of eight *Bothrops* snake venoms. *Comp Biochem Physiol Part D Genomics Proteomics*. 2019; 30: 113–121. <https://doi.org/10.1016/j.cbd.2019.01.012> PMID: 30825662
96. Luciano PM, Silva GEB, Azevedo-Marques MM. Acidente botrópico fatal. *Med Ribeirão Preto*. 2009; 42: 61–65. <https://doi.org/10.11606/issn.2176-7262.v42i1p61-65>
97. Schulz R da S, Queiroz PES, Bastos M de C, Miranda EA, Jesus H dos S de, Gatis SMP. Tratamento da ferida por acidente ofídico: caso clínico. *Cuid Enferm*. 2016; 172–179. Available: <http://www.webfipa.net/facfipa/ner/sumarios/cuidarte/2016v2/172-179.pdf>



98. Graciano AR, Carvalho KCN de. Syndrome associated to snake bite of the Bothrops gender: case report. *Rev Pesqui Em Saúde*. 2018; 18. Available: <http://periodicoseletronicos.ufma.br/index.php/revistahuufma/article/view/7881>
99. Valle LA, Silva D da FR, Magalhães PH, Mattos PA, Leal JA. Amputação bilateral de extremidades inferiores após acidente botrópico grave: relato de um caso. *Arq Méd Hosp E Fac Ciênc Médicas St Casa São Paulo*. 2008; 81–84. Available: <https://arquivosmedicos.fcmsantacasasp.edu.br/index.php/AMSCSP/article/view/404>
100. Malaque CMS, Duayer IF, Santoro ML. Acute kidney injury induced by thrombotic microangiopathy in two cases of Bothrops envenomation. *Clin Toxicol Phila Pa*. 2019; 57: 213–216. <https://doi.org/10.1080/15563650.2018.1510129> PMID: 30430871
101. Mackessy SP, editor. *Handbook of Venoms and Toxins of Reptiles*. 2nd edition. Boca Raton: CRC Press; 2021.
102. Mahmood MA, Halliday D, Cumming R, Thwin KT, Myitzu M, White J, et al. Inadequate knowledge about snakebite envenoming symptoms and application of harmful first aid methods in the community in high snakebite incidence areas of Myanmar. *PLoS Negl Trop Dis*. 2019; 13: e0007171. <https://doi.org/10.1371/journal.pntd.0007171> PMID: 30768596
103. Gutiérrez JM, Lomonte B, Sanz L, Calvete JJ, Pla D. Immunological profile of antivenoms: preclinical analysis of the efficacy of a polyspecific antivenom through antivenomics and neutralization assays. *J Proteomics*. 2014; 105: 340–350. <https://doi.org/10.1016/j.jprot.2014.02.021> PMID: 24583507
104. Bolon I, Durso AM, Mesa SB, Ray N, Alcoba G, Chappuis F, et al. Identifying the snake: First scoping review on practices of communities and healthcare providers confronted with snakebite across the world. *PLOS ONE*. 2020; 15: e0229989. <https://doi.org/10.1371/journal.pone.0229989> PMID: 32134964
